# Supplementary material
Source: publisher figshare collection journal article supplement (https://acs.figshare.com/ndownloader/files/4050214)
Supplement: Supplementary file 1 [file 4050214]

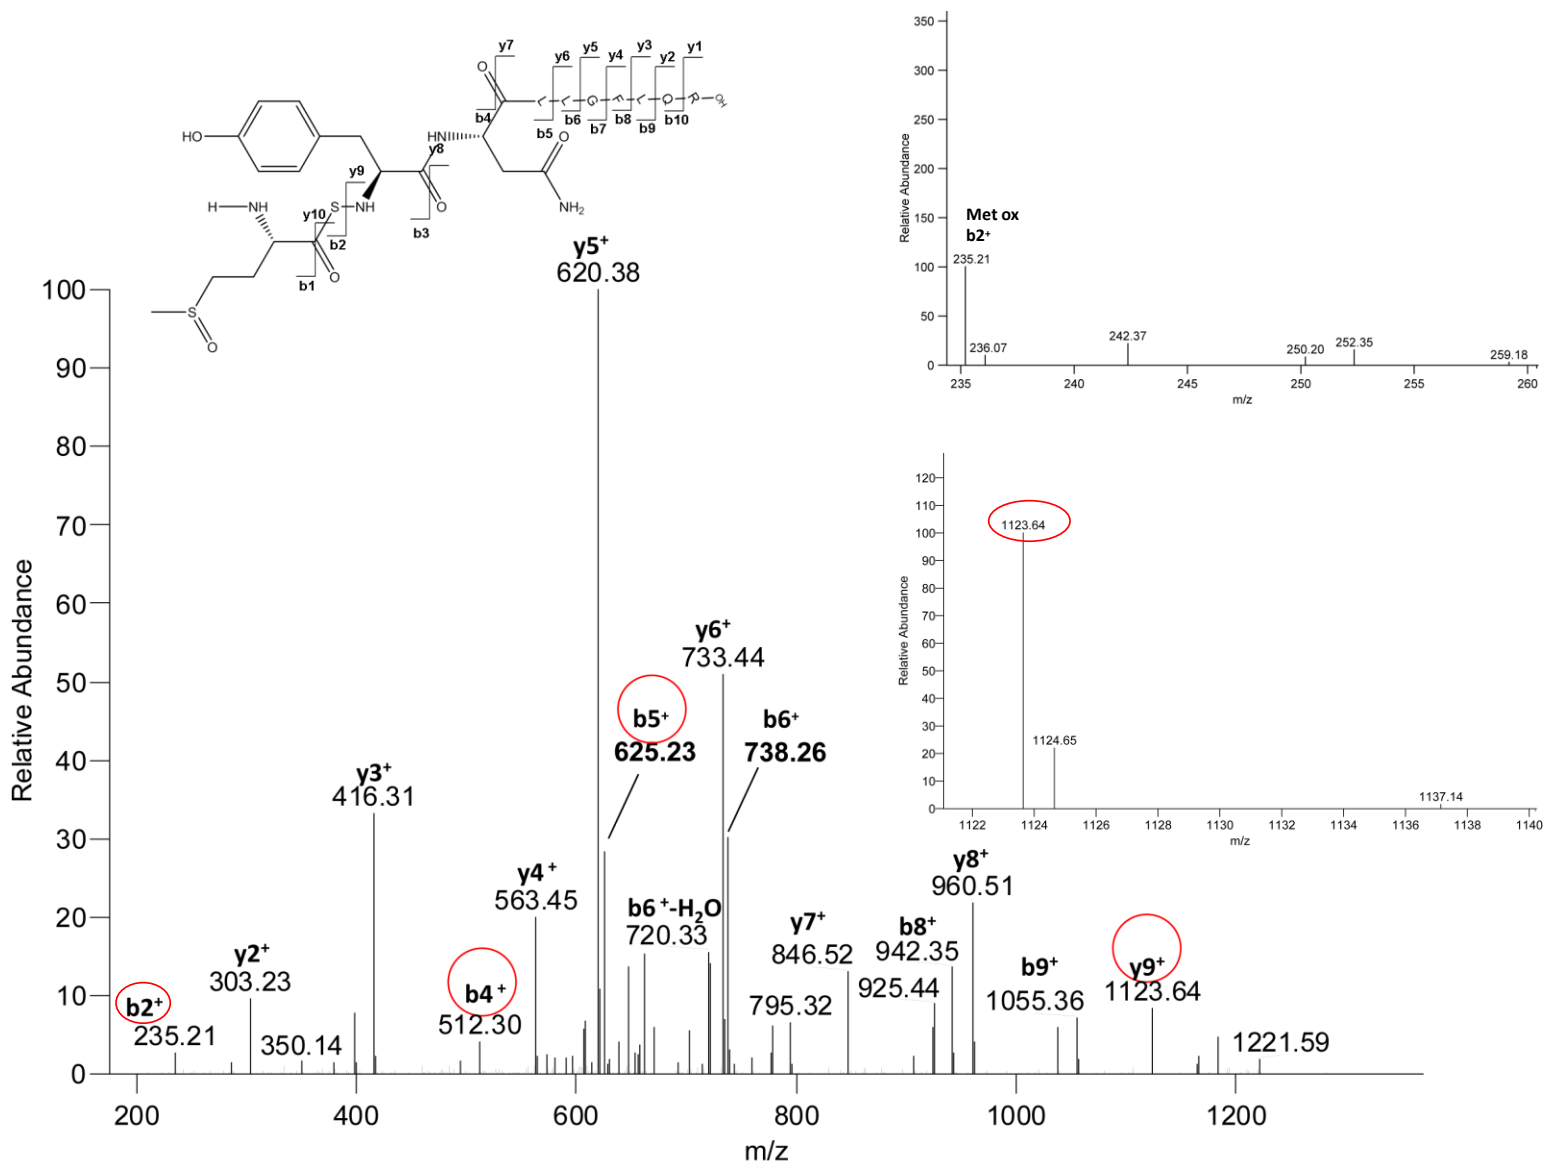

**Figure S1** MS/MS spectrum and suggested chemical structure for the oxidized (+16 Da) sequence **M<sub>1</sub>SYNLLGFLQR<sub>11</sub>** (theoretical mass 1356.70, experimental  $m/z$  679.35  $[M+H]^{2+}$ ,  $\Delta m$  from parent peptide 0.00).

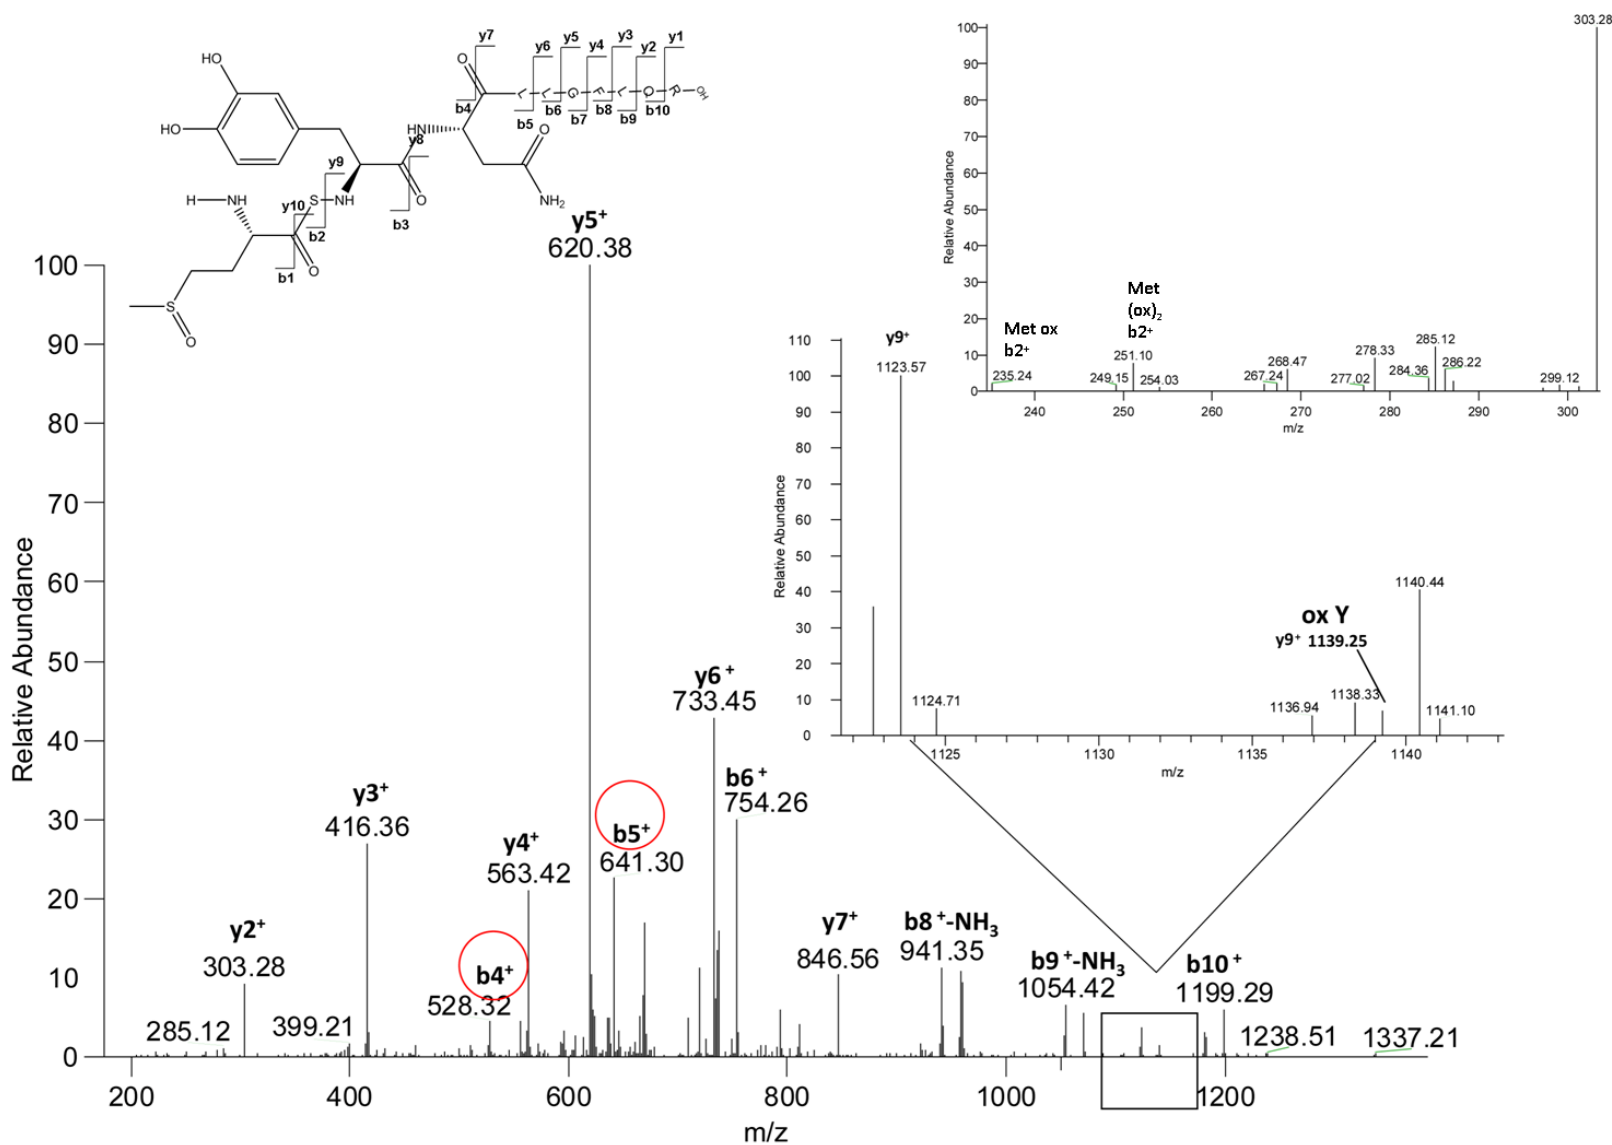

**Figure S2** MS/MS spectrum and suggested chemical structure for the oxidized (+32 Da) sequence  $M_1SYNLLGFLQR_{11}$  (theoretical mass 1372.69, experimental  $m/z$  687.35  $[M+H]^{2+}$ ,  $\Delta m$  from parent peptide +0.01).

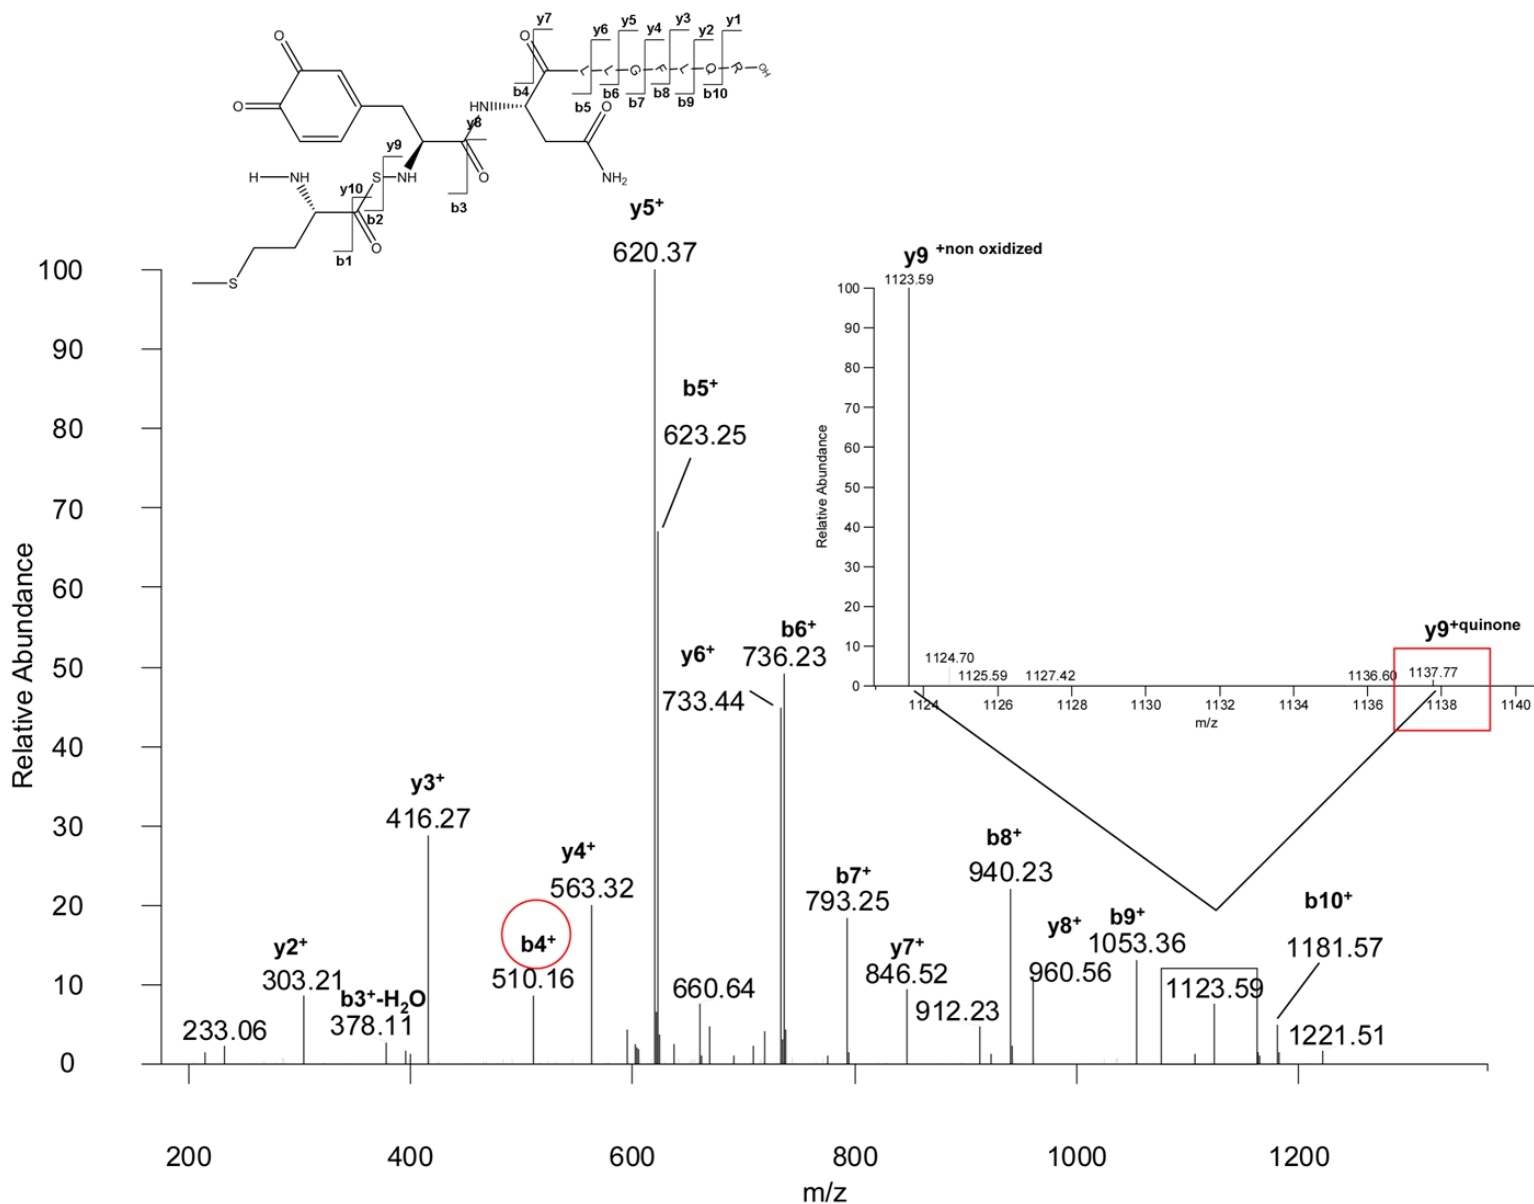

**Figure S3** MS/MS spectrum and suggested chemical structure for the oxidized (+14 Da) sequence **M<sub>1</sub>SYNLLGFLQR<sub>11</sub>** (theoretical  $m/z$  1354.68, experimental  $m/z$  678.34  $[M+H]^{2+}$ ,  $\Delta m$  from parent peptide 0.00).

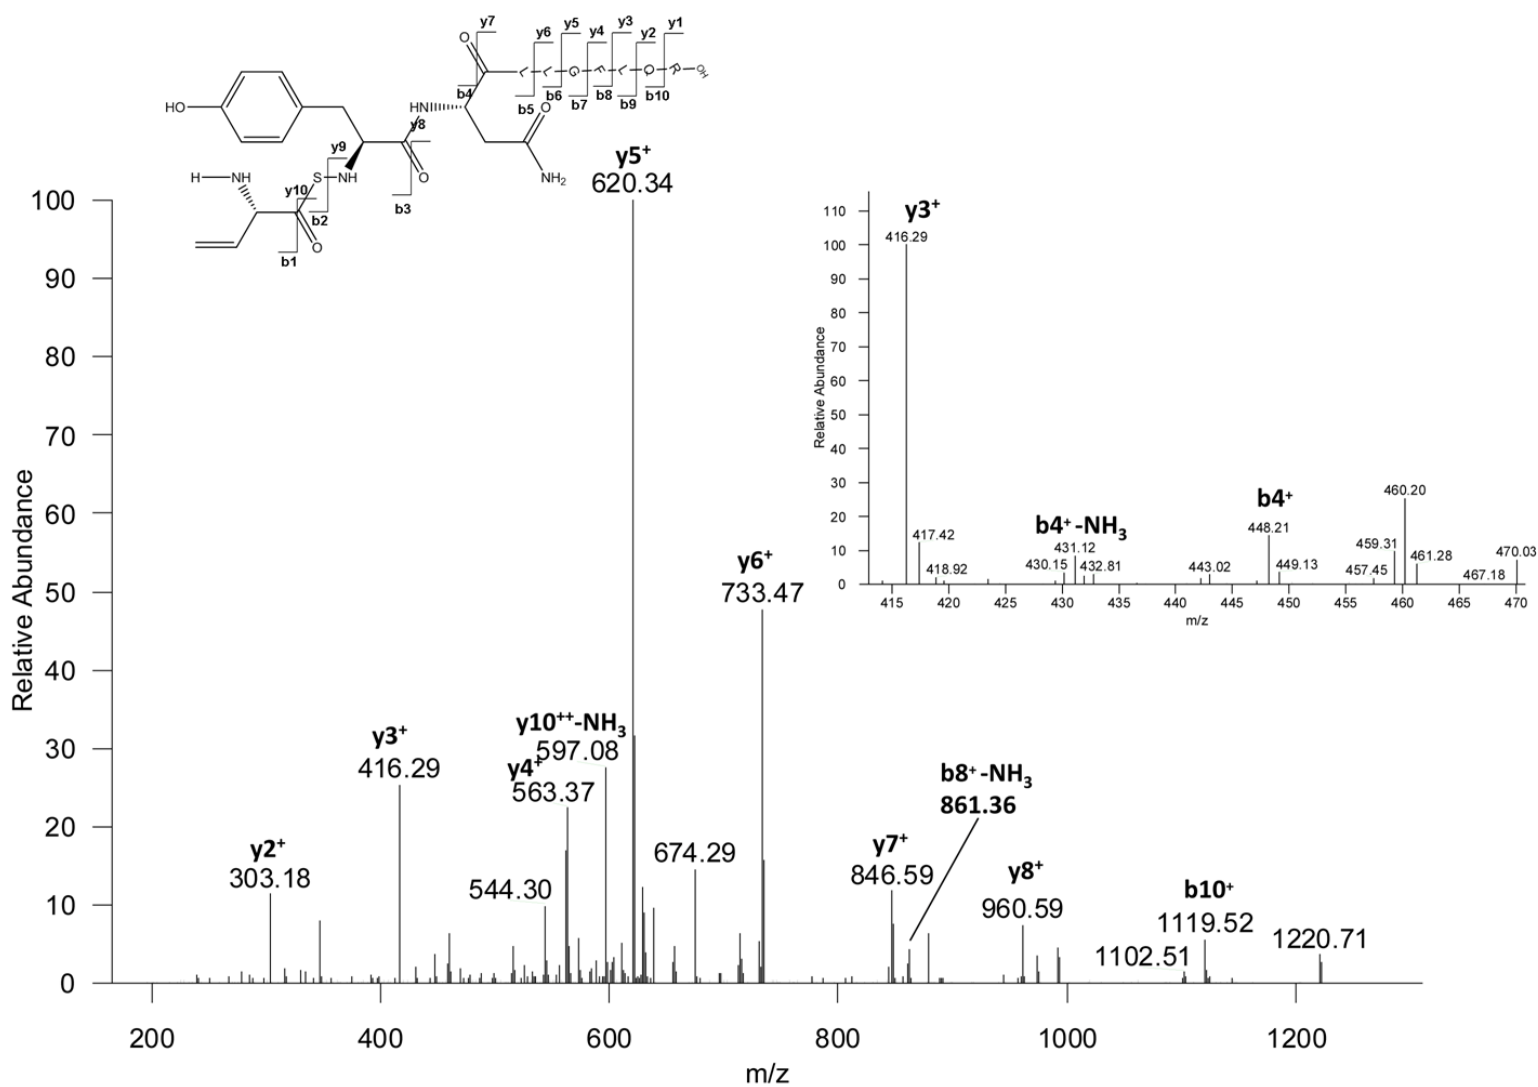

**Figure S4** MS/MS spectrum and suggested chemical structure for the modify sequence **M<sub>1</sub>SYNLLGFLQR<sub>11</sub>**, where loss of methane sulfenic acid (CH<sub>3</sub>SOH, -64 Da) occurred as a consequence of Met1 oxidation. For comparison, please refer to Figure S1, where the MS/MS spectrum for the same sequence containing oxidized Met1 (+16 Da) is shown (theoretical *mass* 1292.68, experimental *m/z* 647.35 [M+H]<sup>2+</sup>, Δ*m* from parent peptide +0.02).

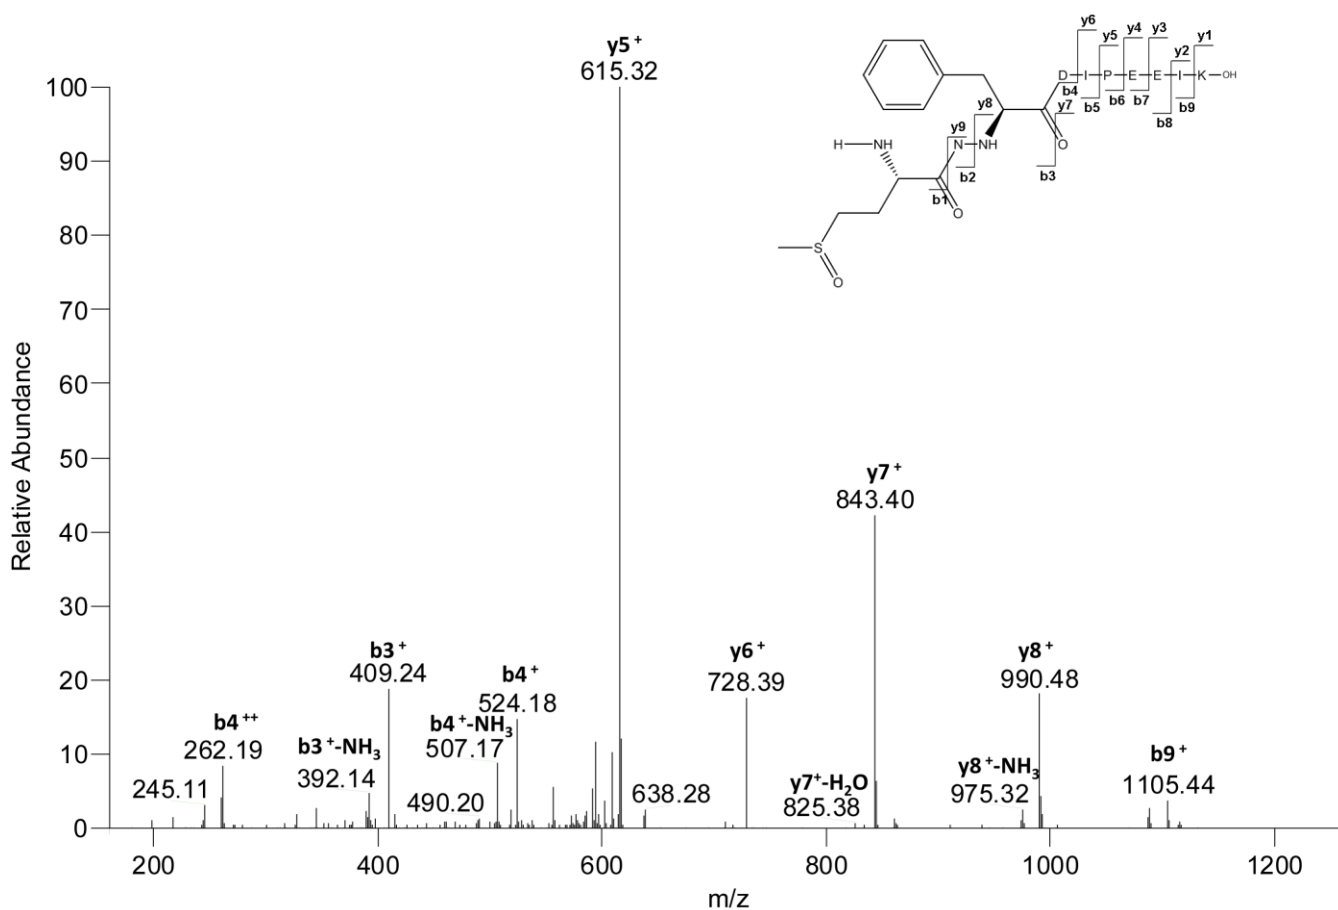

**Figure S5a** MS/MS spectrum and suggested chemical structure for the oxidized (+16 Da) sequence **M<sub>36</sub>NFDIPEEIK<sub>45</sub>** (theoretical *mass* 1250.59, experimental *m/z* 626.30 [M+H]<sup>2+</sup>, Δ*m* from native parent peptide +0.01). Note that either Met36 or Phe38 is oxidized.

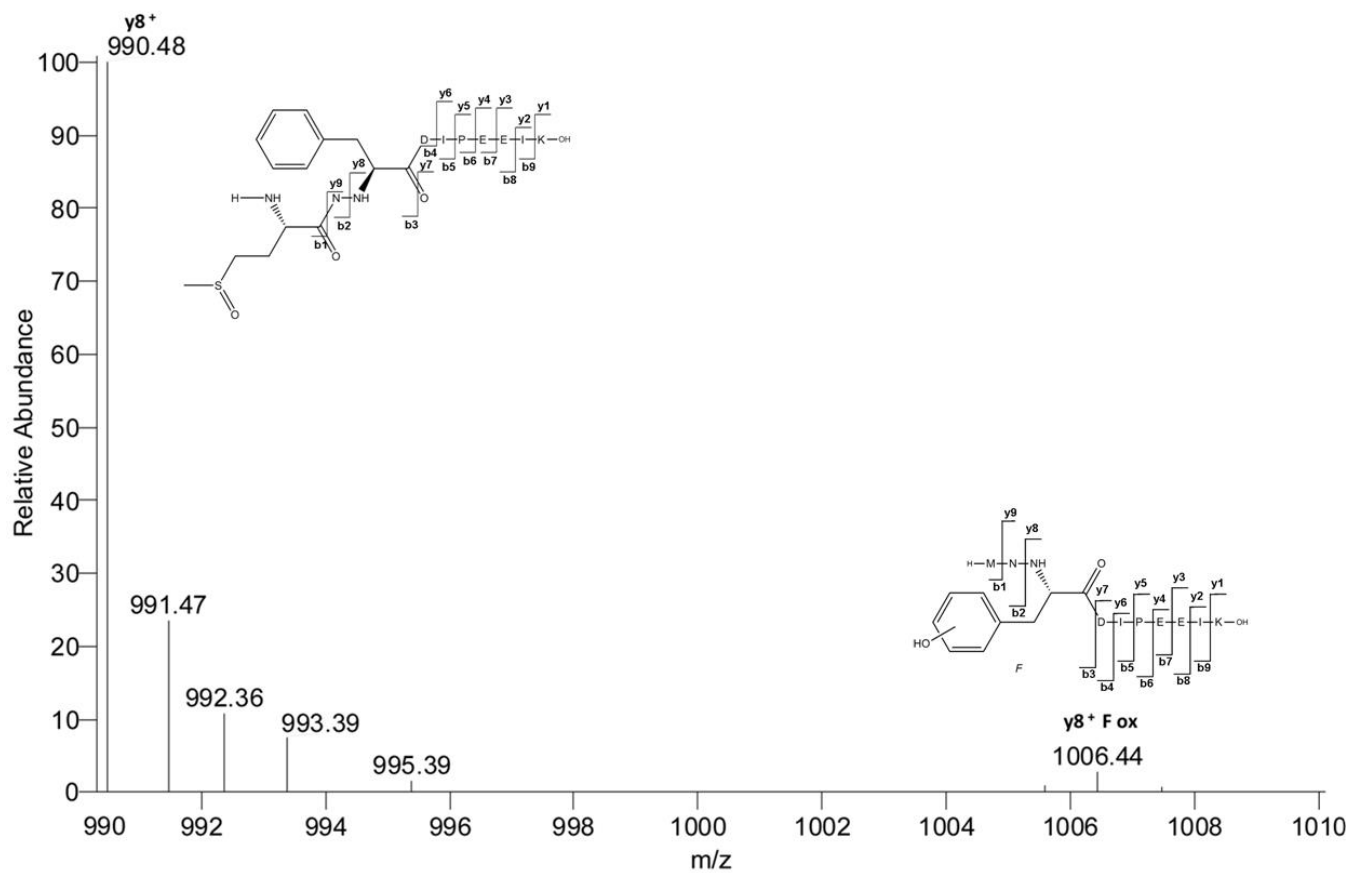

**Figure S5b** Zoom in (m/z range 988-1010) of the MS/MS spectrum depicted in figure S5a and suggested chemical structures for the oxidized (+16 Da) sequence  $M_{36}NFDIPEEIK_{45}$  in which either Met or Phe is oxidized.

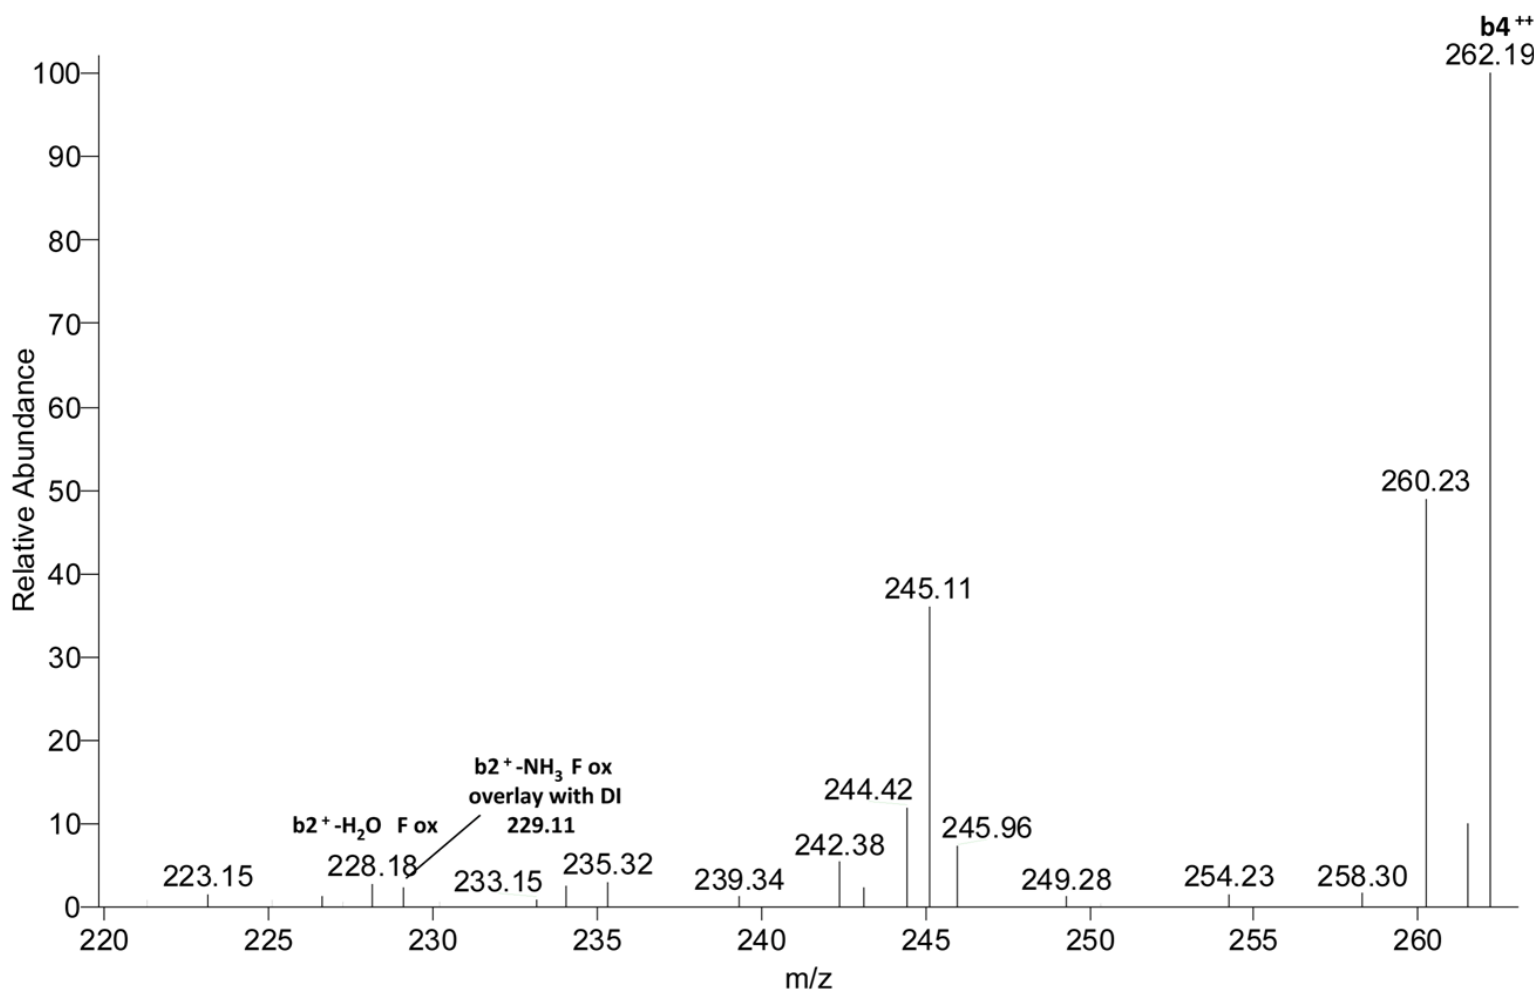

**Figure S5c** Zoom in ( $m/z$  range 220-265) of the MS/MS spectrum depicted in figure S5a.

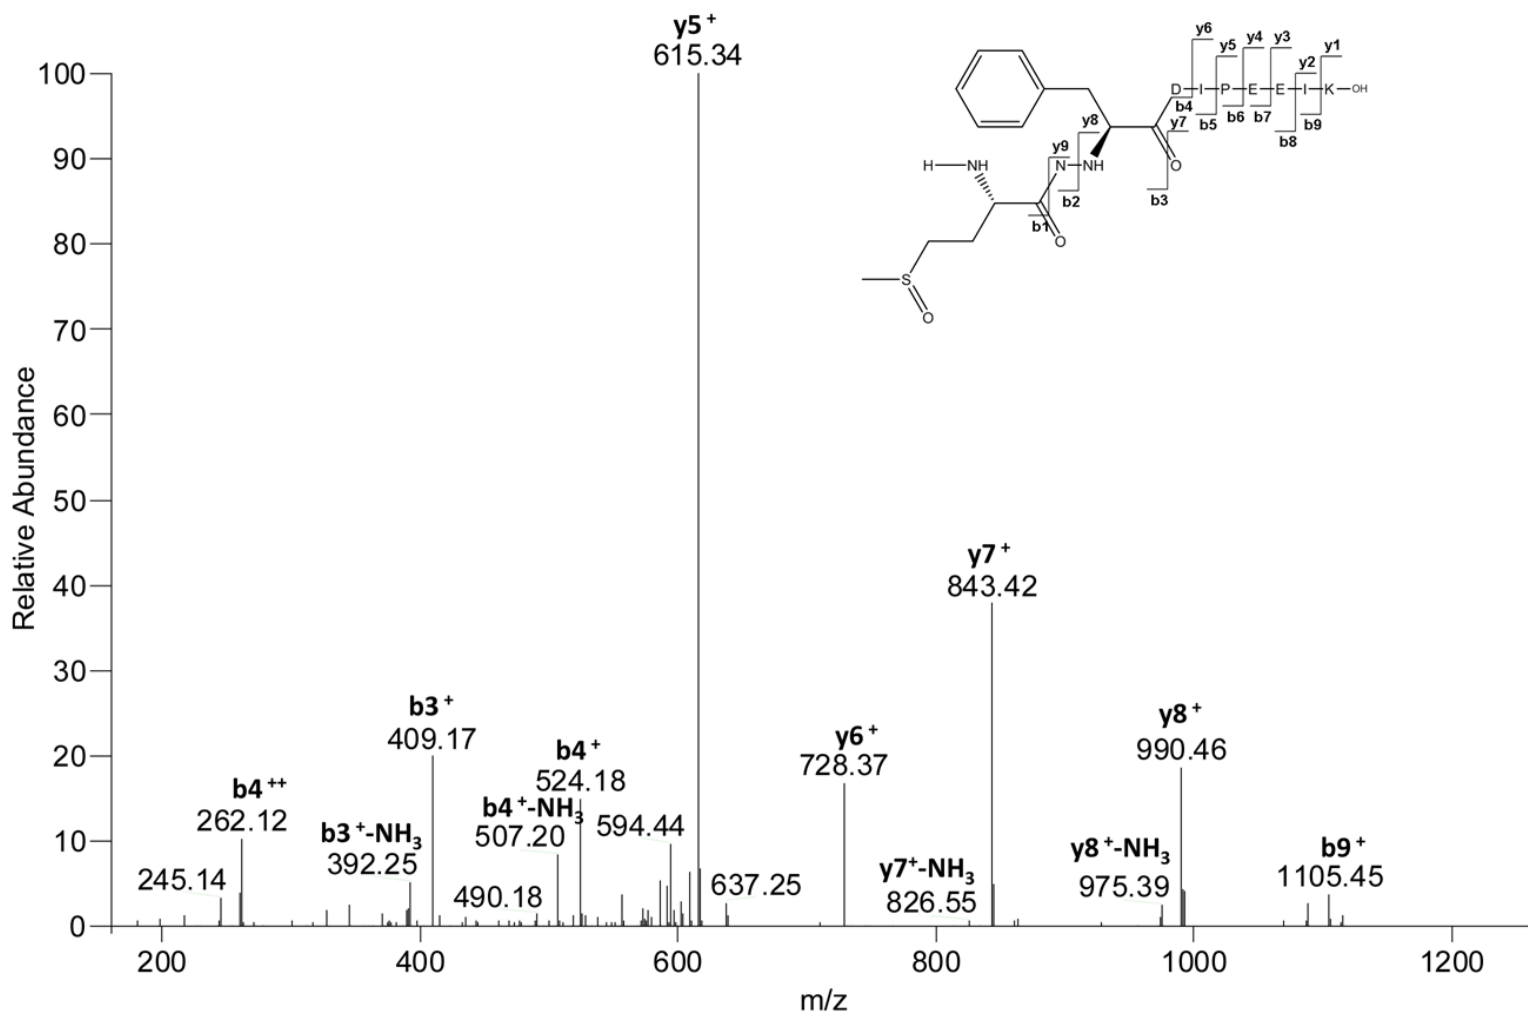

**Figure S6a** MS/MS spectrum and suggested chemical structure for the oxidized (+16 Da) sequence **M<sub>36</sub>NFDIPEEIK<sub>45</sub>** (theoretical *mass* 1250.59, experimental  $m/z$  626.30  $[M+H]^{2+}$ ,  $\Delta m$  from native parent peptide +0.01). Note that this spectrum was obtained from non-oxidized IFN $\beta$ 1a, where only Met36 is oxidized.



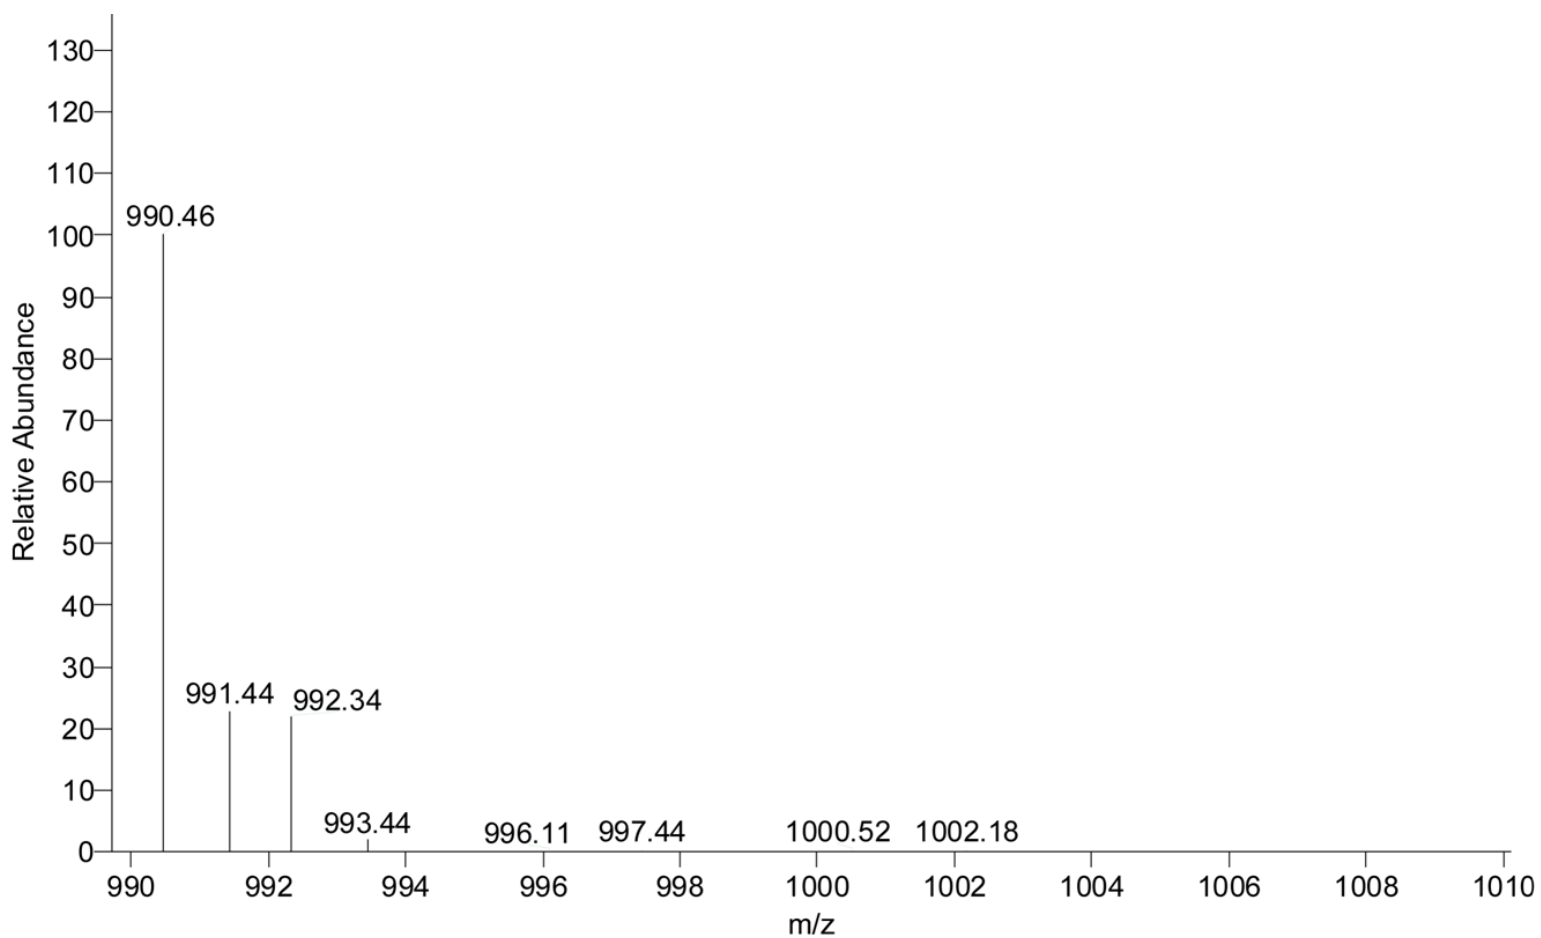

**Figure S6b** Zoom in (m/z range 988-1010) of the MS/MS spectrum depicted in figure S6a

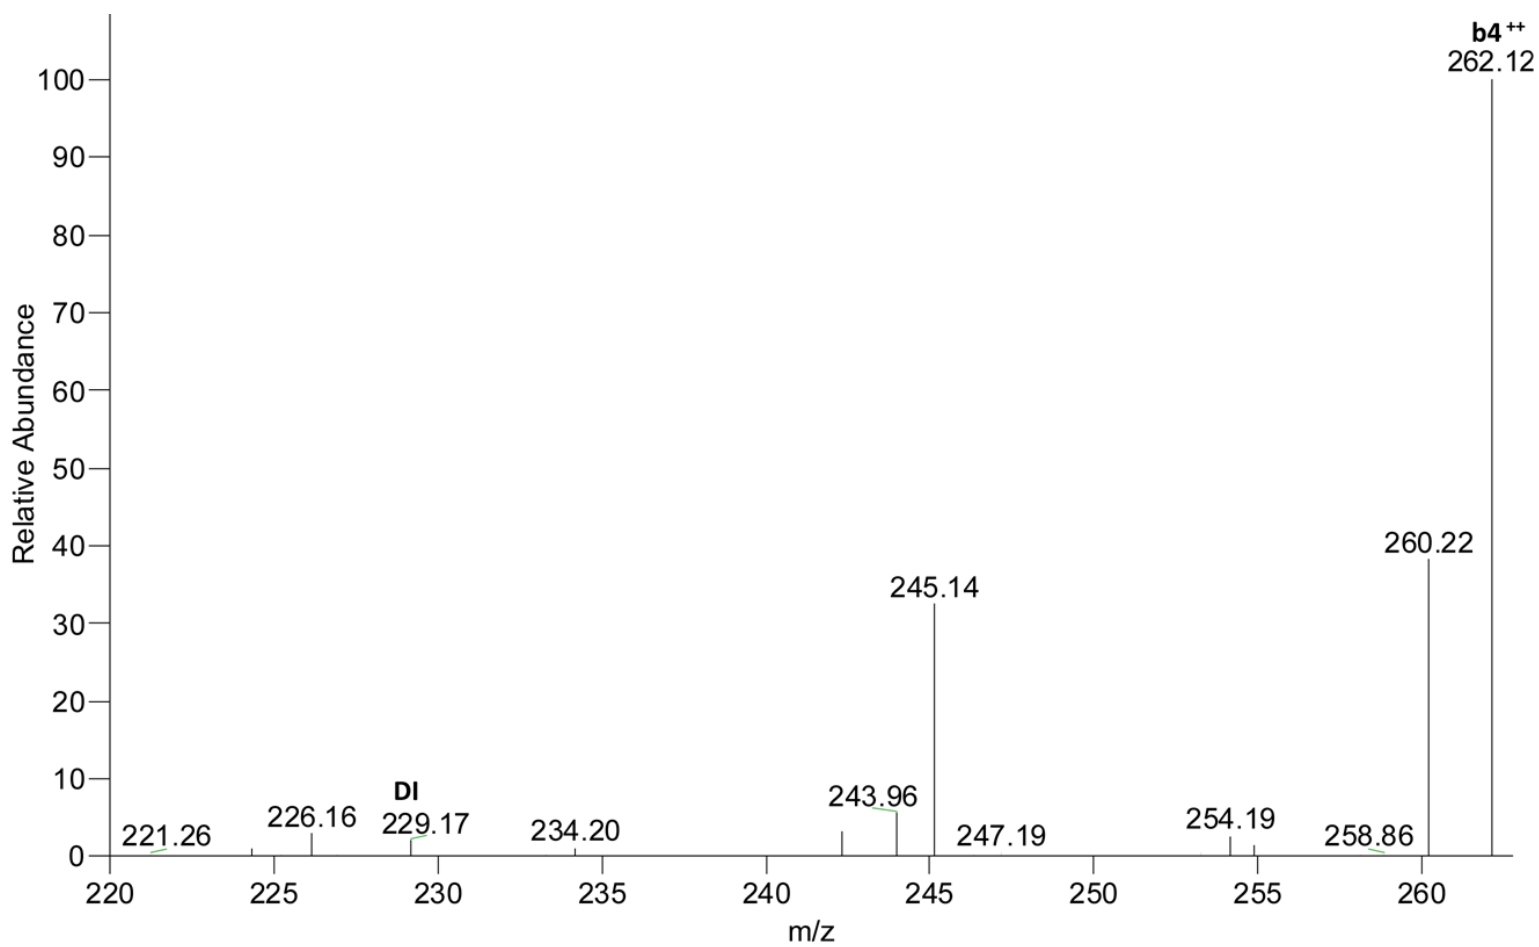

**Figure S6c** Zoom in (m/z range 220-265) of the MS/MS spectrum depicted in figure S6a.

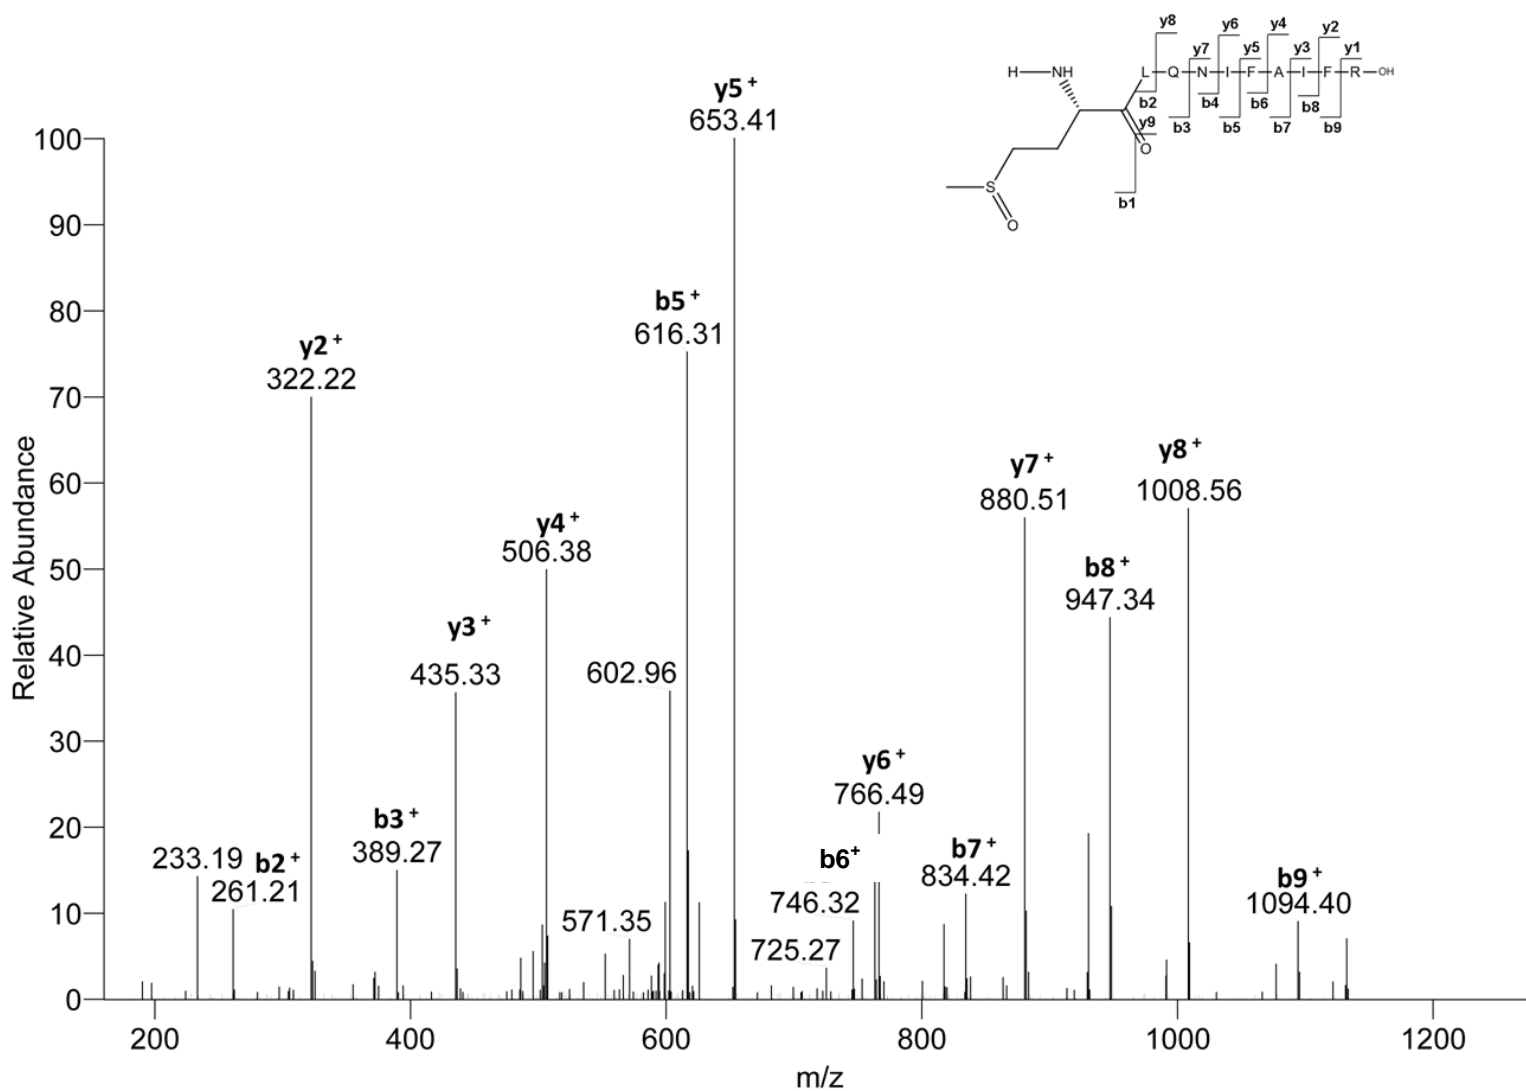

**FigureS7** MS/MS spectrum and suggested chemical structure for the oxidized (+16 Da) sequence  $M_{62}LQNIFAIFR_{71}$  (theoretical mass 1267.68, experimental  $m/z$  634.84  $[M+H]^{2+}$ ,  $\Delta m$  from native parent peptide 0.00).



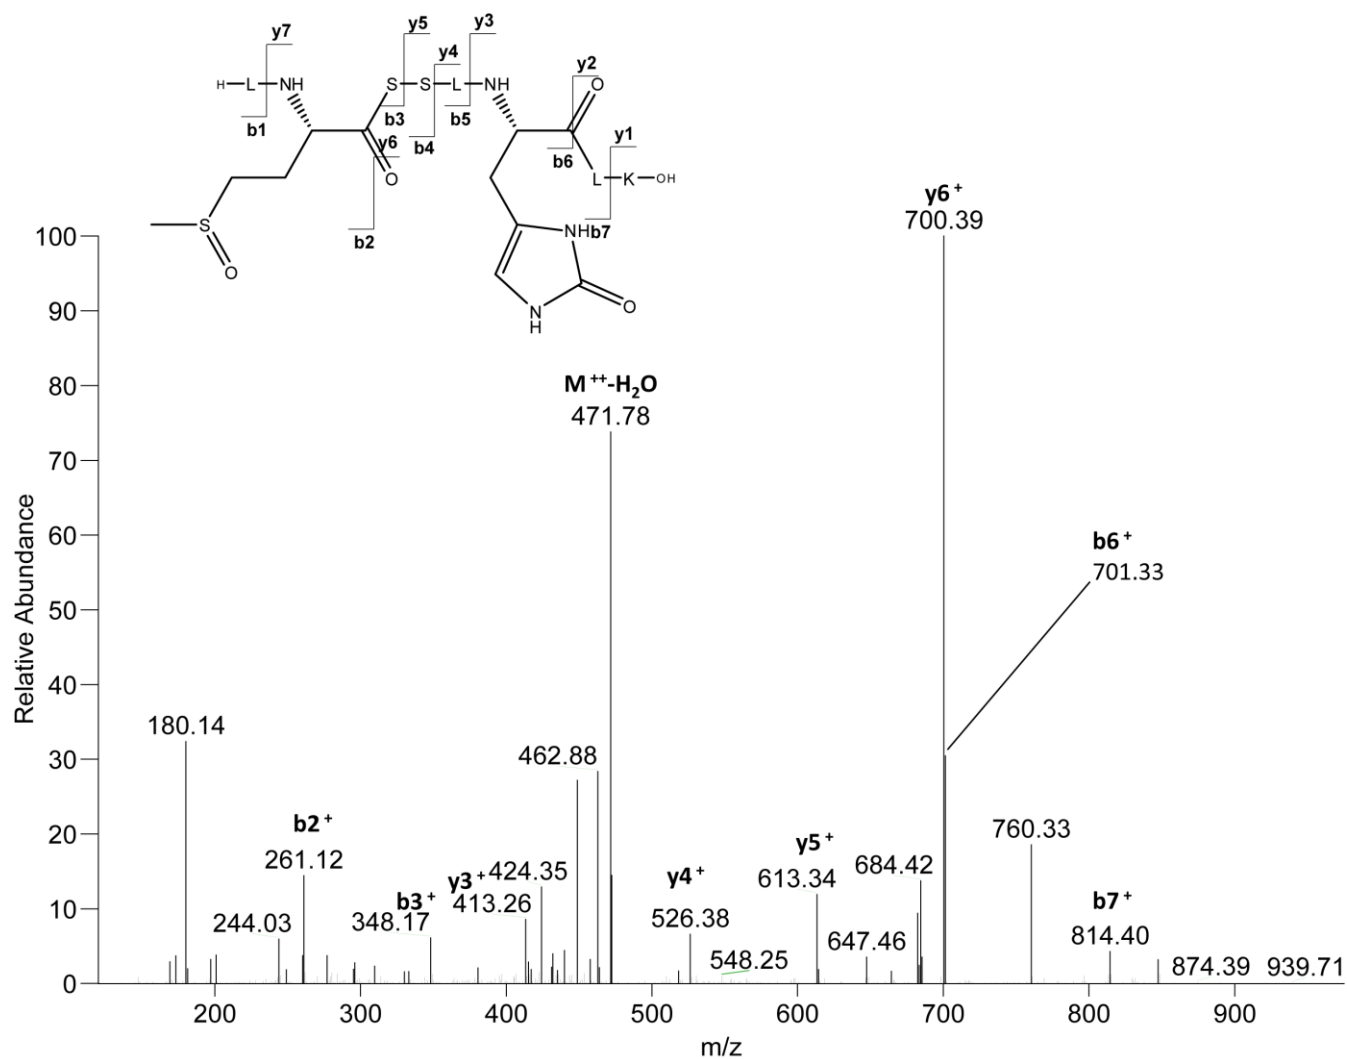

**Figure S9** MS/MS spectrum and suggested chemical structure for the oxidized (+32 Da) sequence **L<sub>116</sub>MSSLHLK<sub>123</sub>** (theoretical mass 959.52, experimental  $m/z$  480.76  $[M+H]^{2+}$ ,  $\Delta m$  from native parent peptide 0.00).

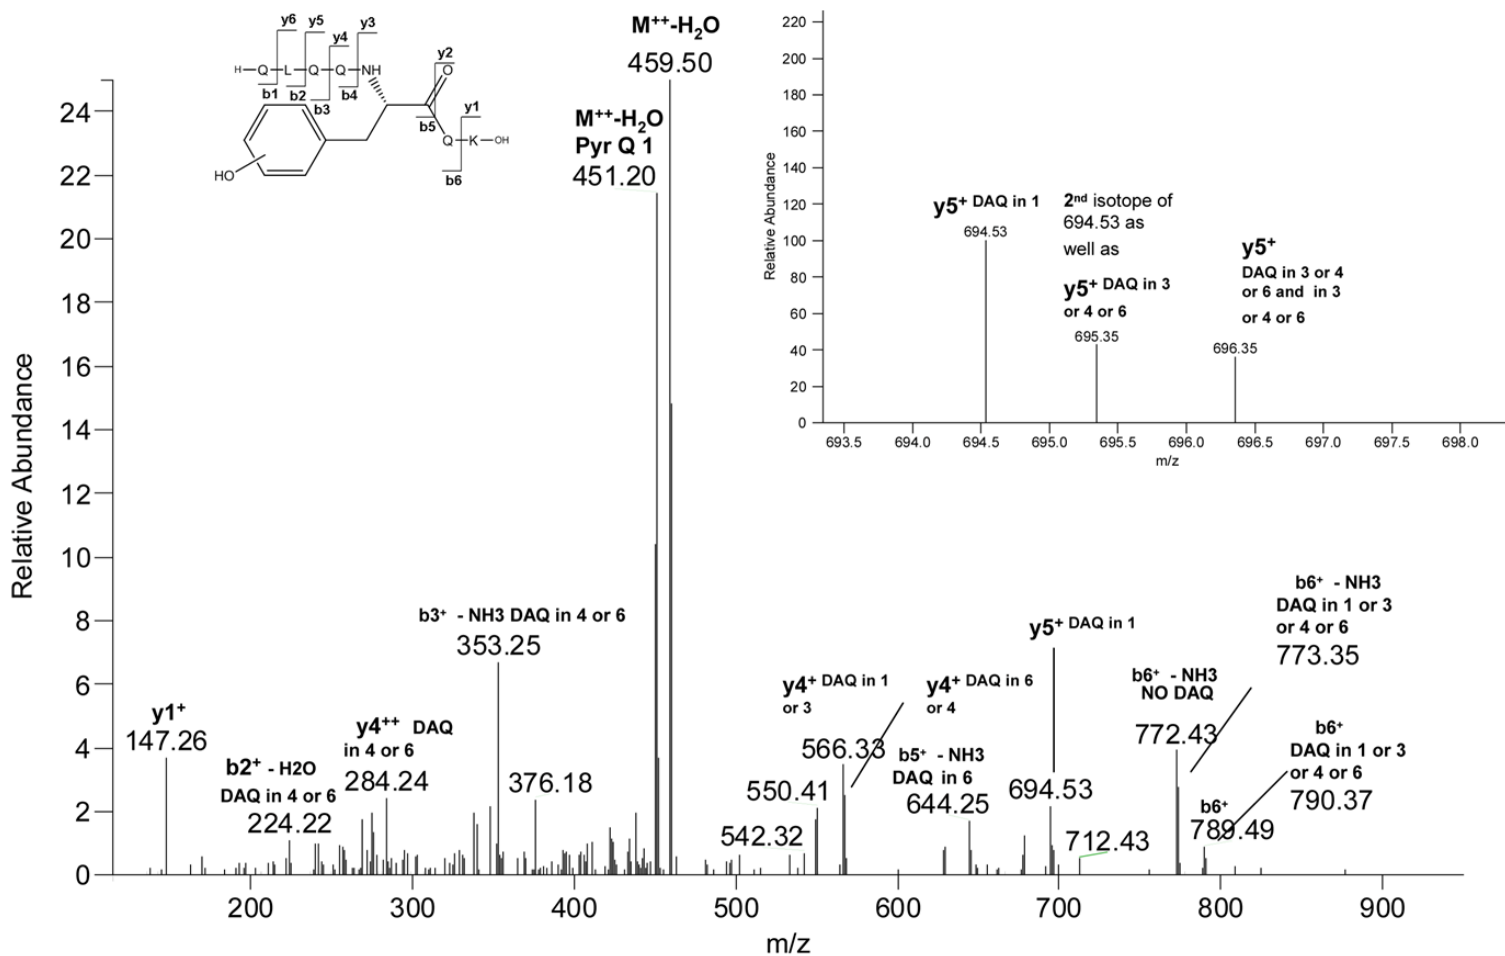

**Figure S10** MS/MS spectrum and suggested chemical structure for the oxidized (+16 Da) sequence  $Q_{46}LQQFQK_{52}$  (theoretical mass 935.48, experimental  $m/z$  468.76  $[M+H]^{2+}$ ,  $\Delta m$  from native parent peptide +0.04).

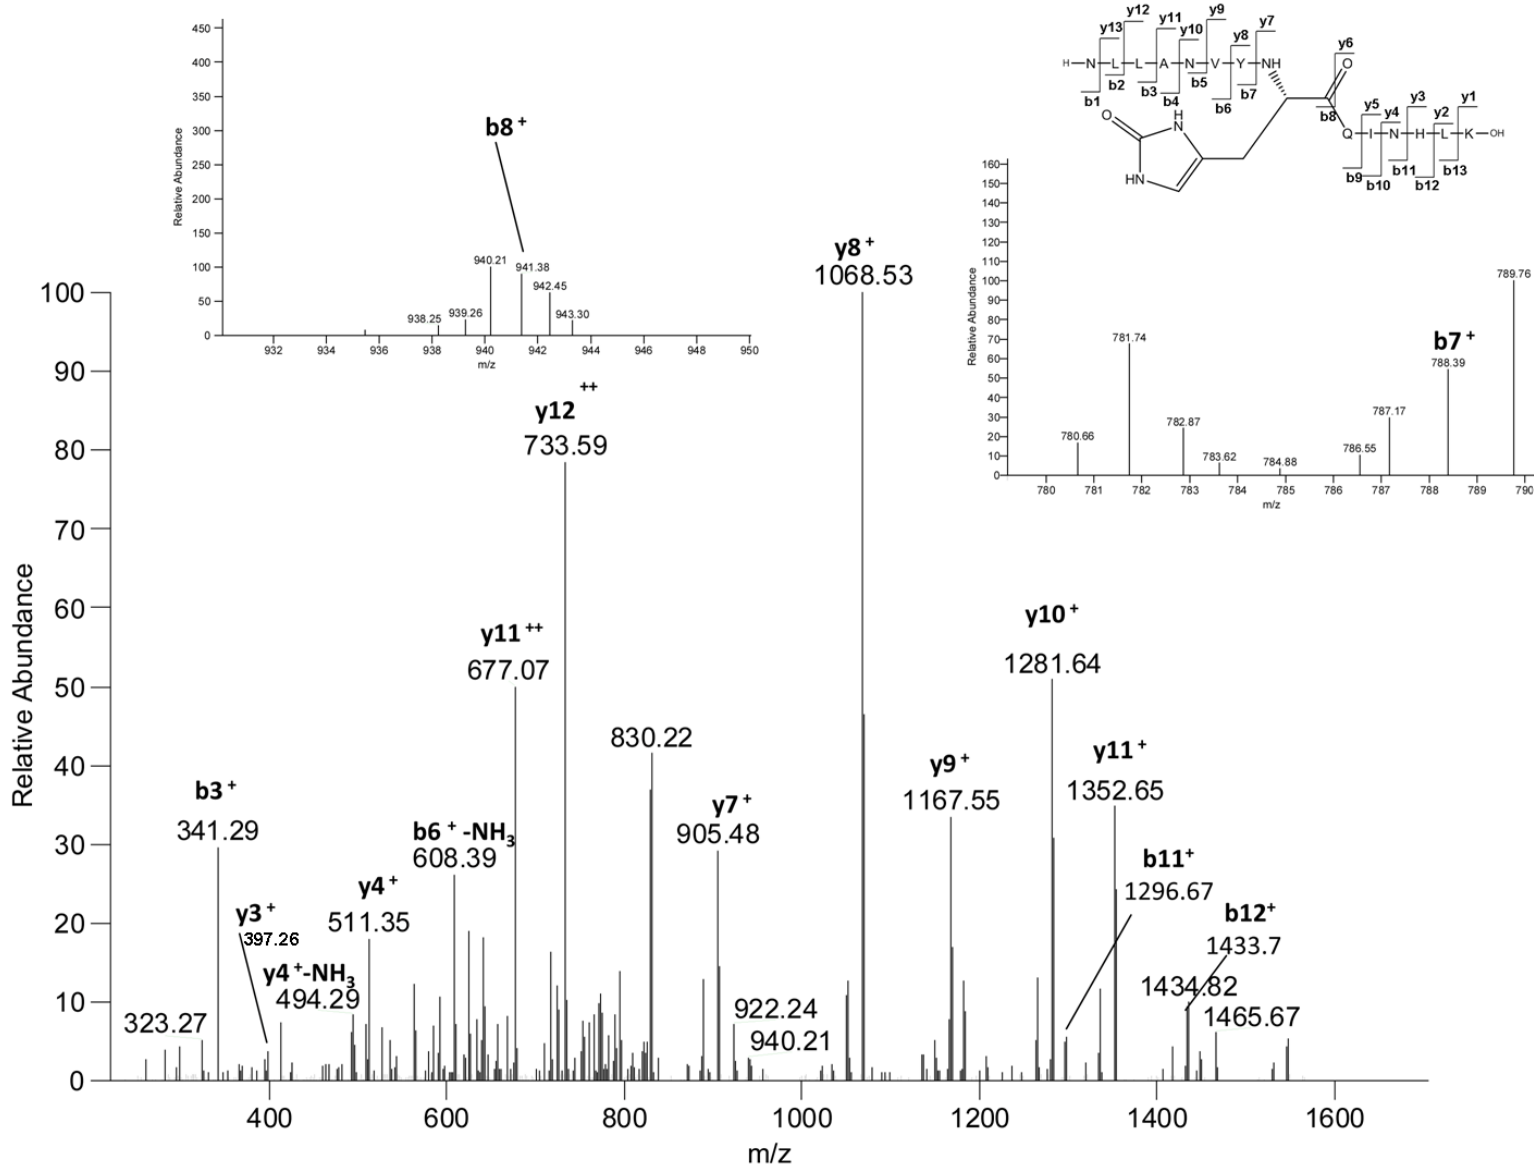

**Figure S11** MS/MS spectrum and suggested chemical structure for the oxidized (+16 Da) sequence **N<sub>86</sub>LLANVYHQINHLK<sub>99</sub>** (theoretical  $m/z$  1691.92, experimental  $m/z$  846.96  $[M+H]^{2+}$ ,  $\Delta m$  from native parent peptide 0.00).

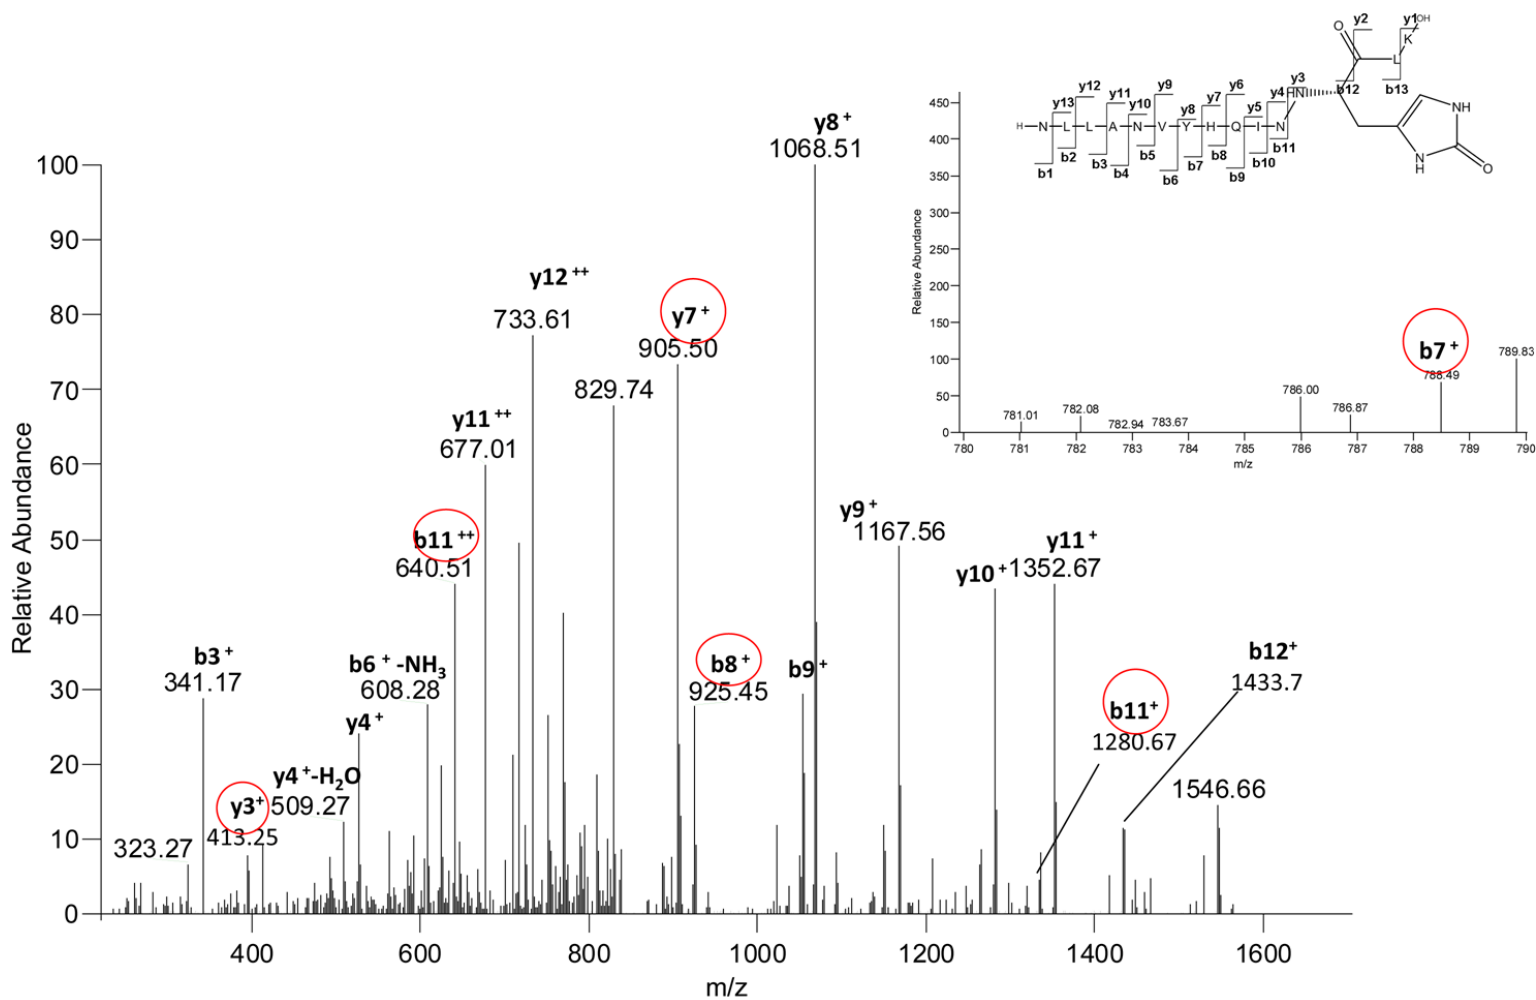

**Figure S12** MS/MS spectrum and suggested chemical structure for the oxidized (+16 Da) sequence **N<sub>86</sub>LLANVYHQINHLK<sub>99</sub>** (theoretical mass 1691.92, experimental  $m/z$  846.96  $[M+H]^{2+}$ ,  $\Delta m$  from native parent peptide 0.00).



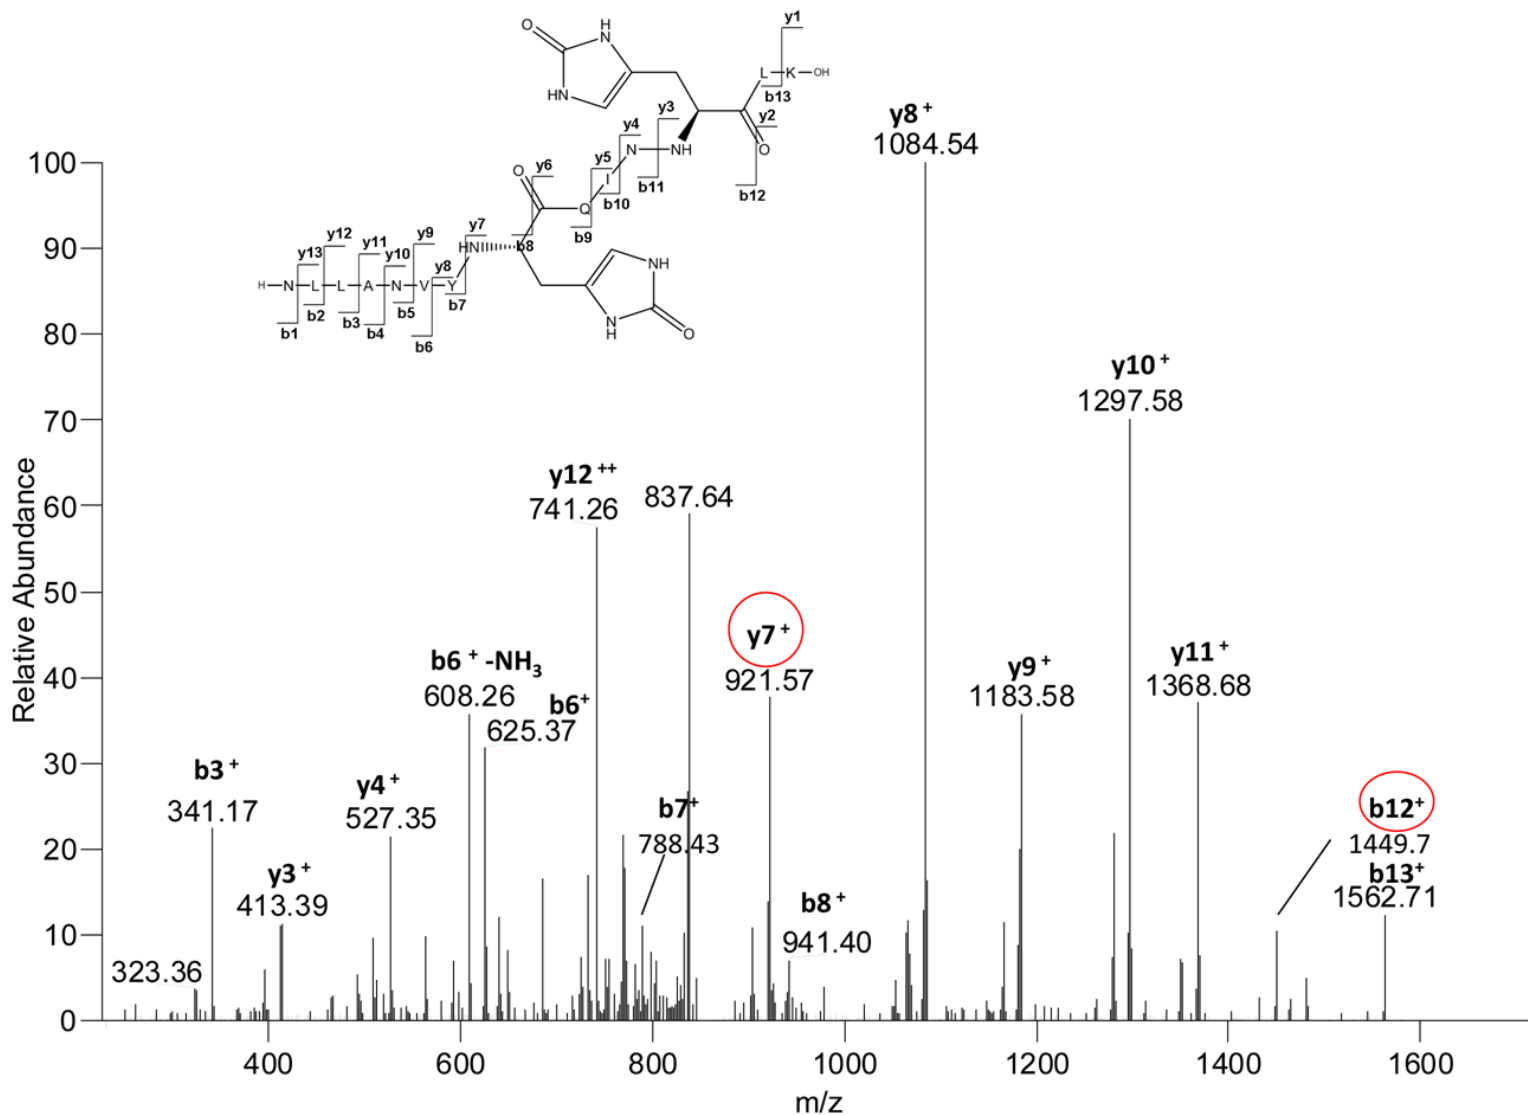

**Figure S13** MS/MS spectrum and suggested chemical structure for the oxidized (+32 Da) sequence **N<sub>86</sub>LLANVYHQINHLK<sub>99</sub>** (theoretical mass 1707.91, experimental  $m/z$  854.96  $[M+H]^{2+}$ ,  $\Delta m$  from native parent peptide +0.01).

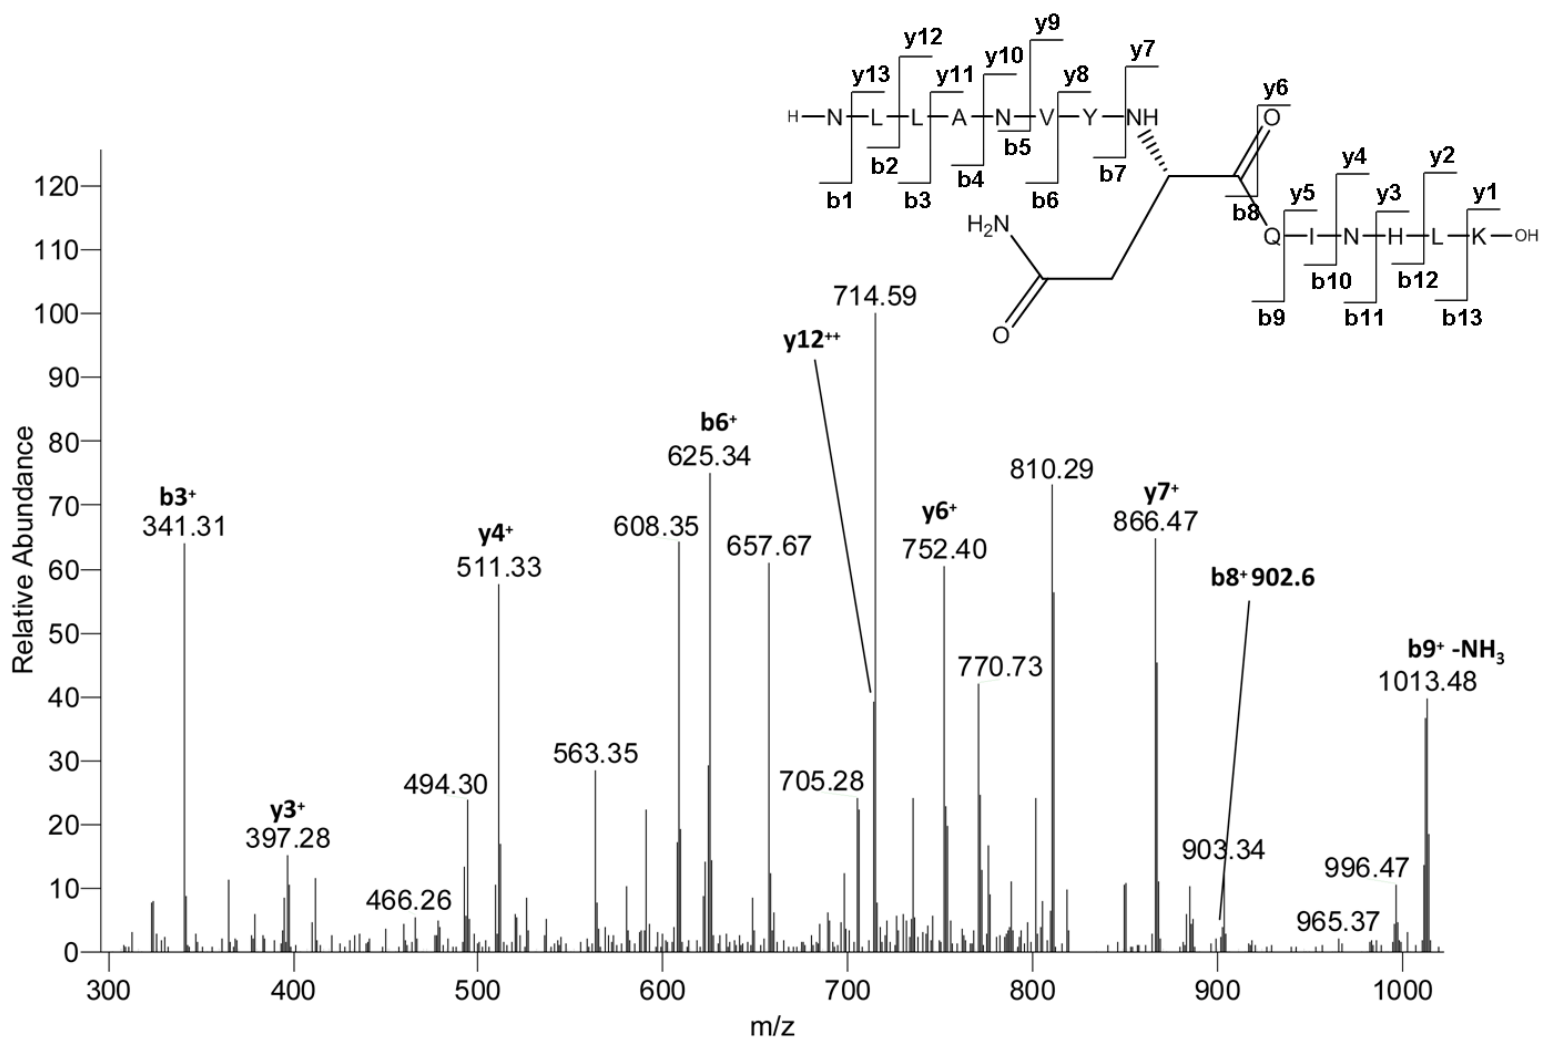

**Figure S14a** MS/MS spectrum and chemical structure for the oxidized (-23 Da) sequence  $N_{86}LLANVYHQINHLK_{99}$  (theoretical mass 1652.91, experimental  $m/z$  827.46  $[M+H]^{2+}$ ,  $\Delta m$  from native parent peptide +0.01).

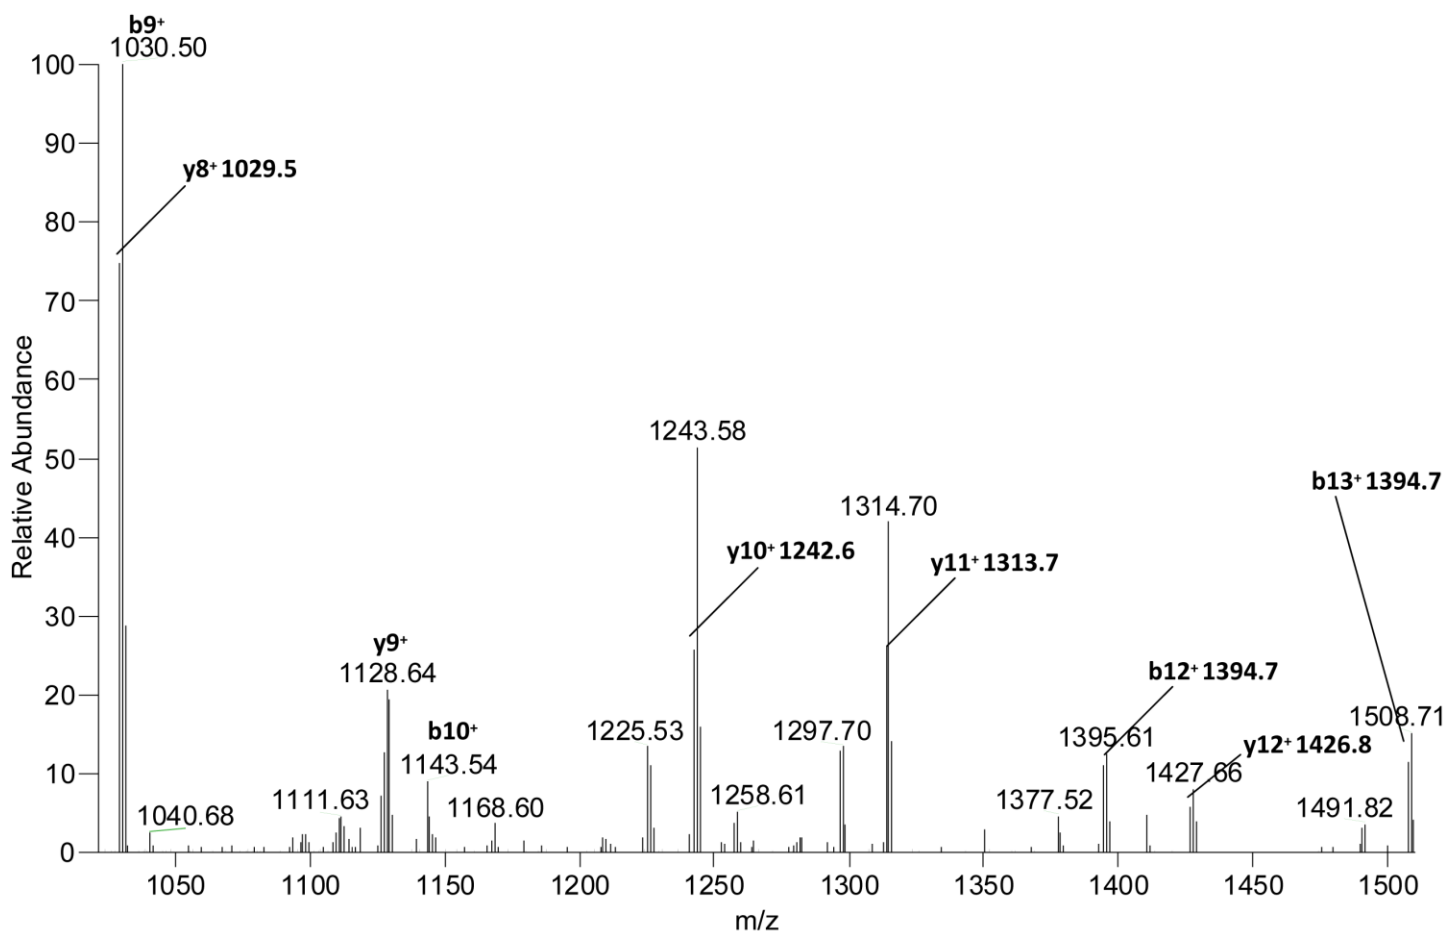

**Figure S14b** Zoom in (m/z range 1010-1510) of the MS/MS spectrum depicted in figure S14a.

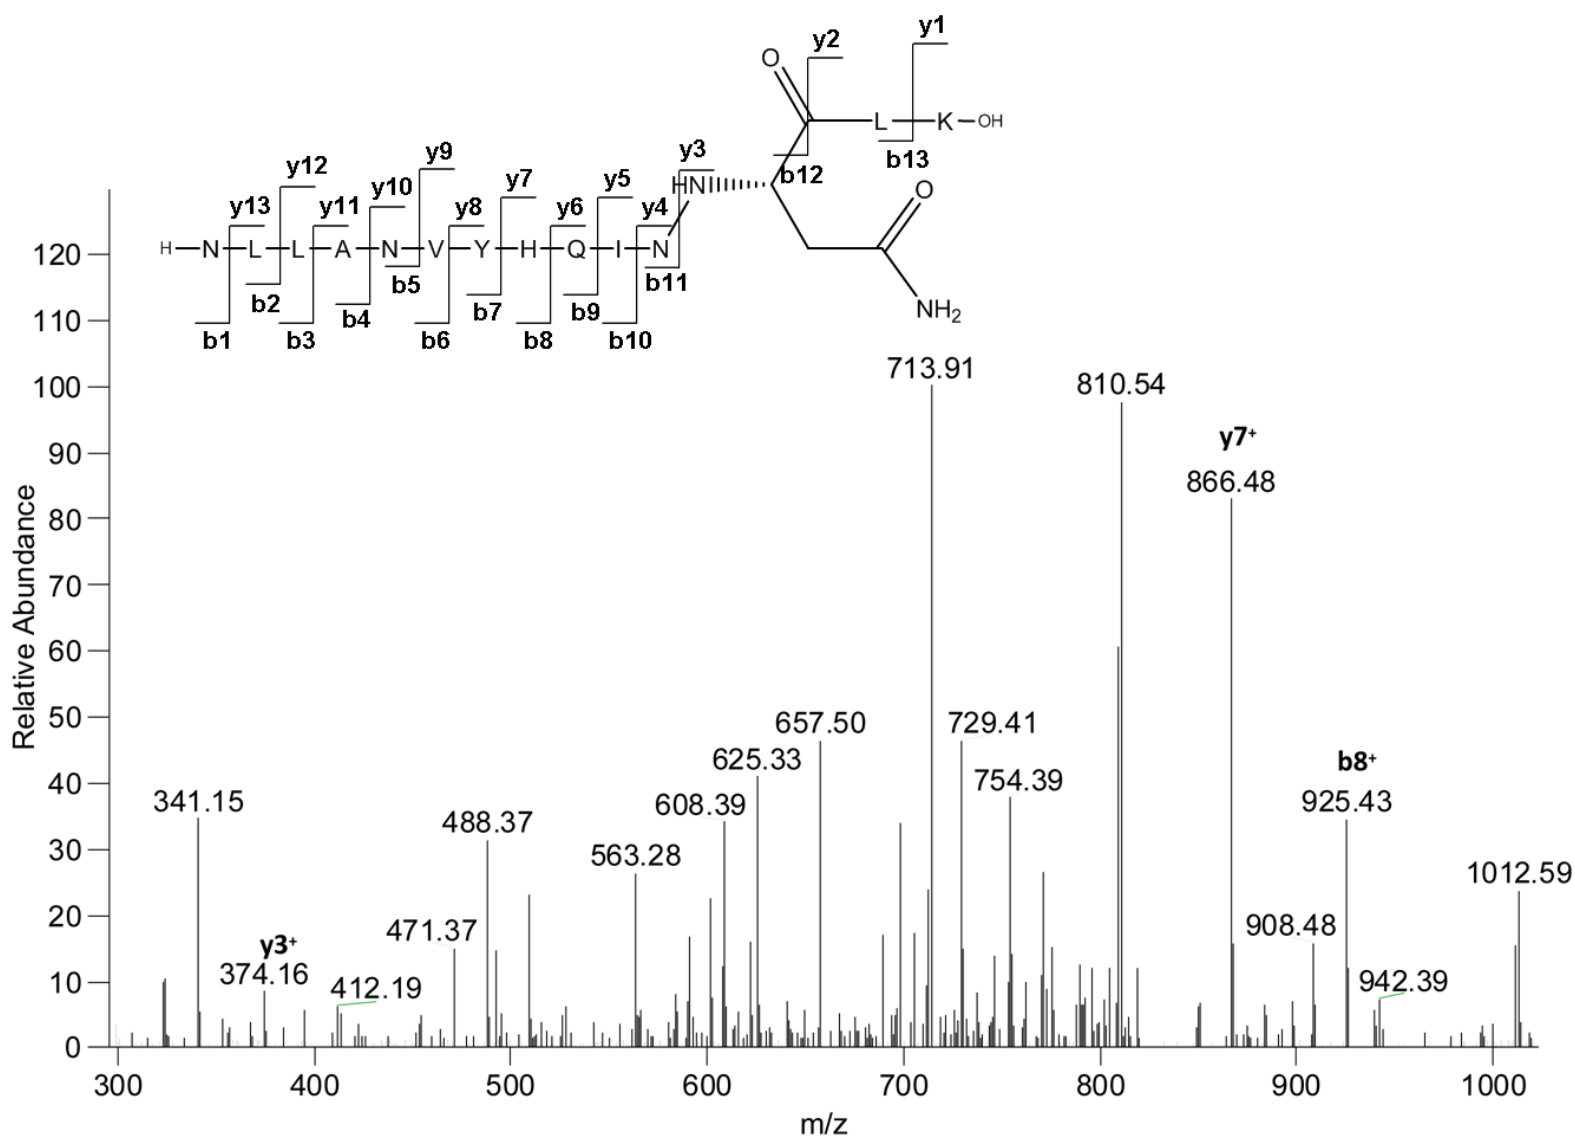

**Figure S15a** MS/MS spectrum and suggested chemical structure for the oxidized sequence **N<sub>86</sub>LLANVYHQINHLK<sub>99</sub>** (theoretical mass 1652.91, experimental  $m/z$  827.46  $[M+H]^{2+}$ ,  $\Delta m$  from native parent peptide +0.01).

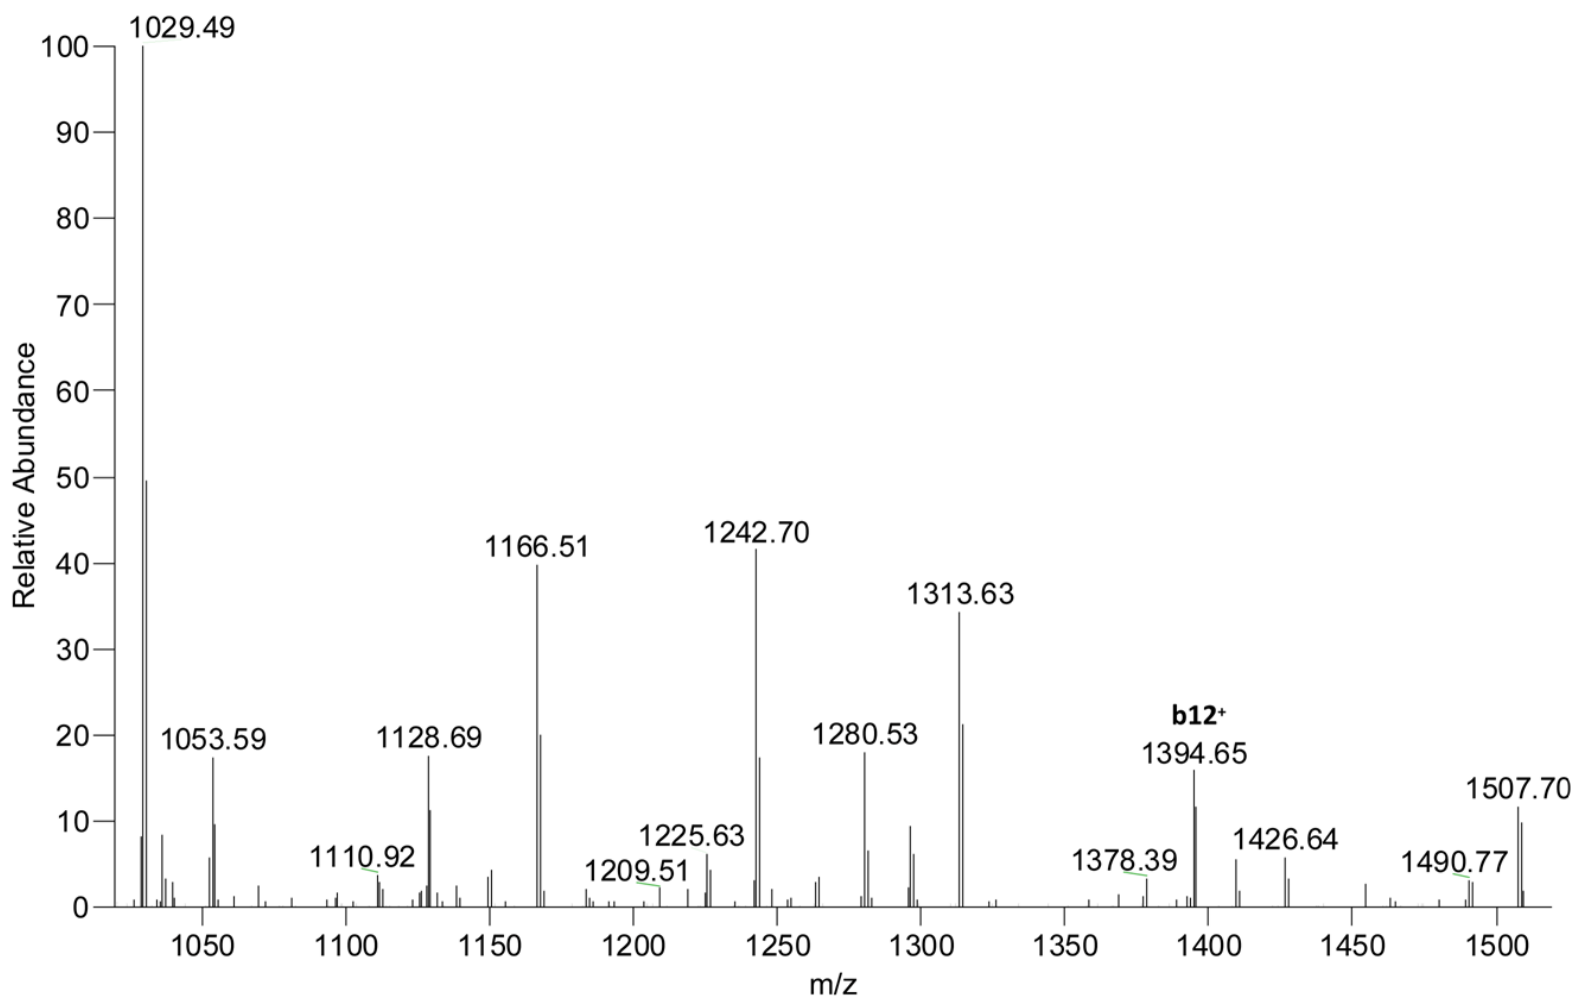

**Figure S15b** Zoom in (m/z range 1010-1510) of the MS/MS spectrum depicted in figure S15a.

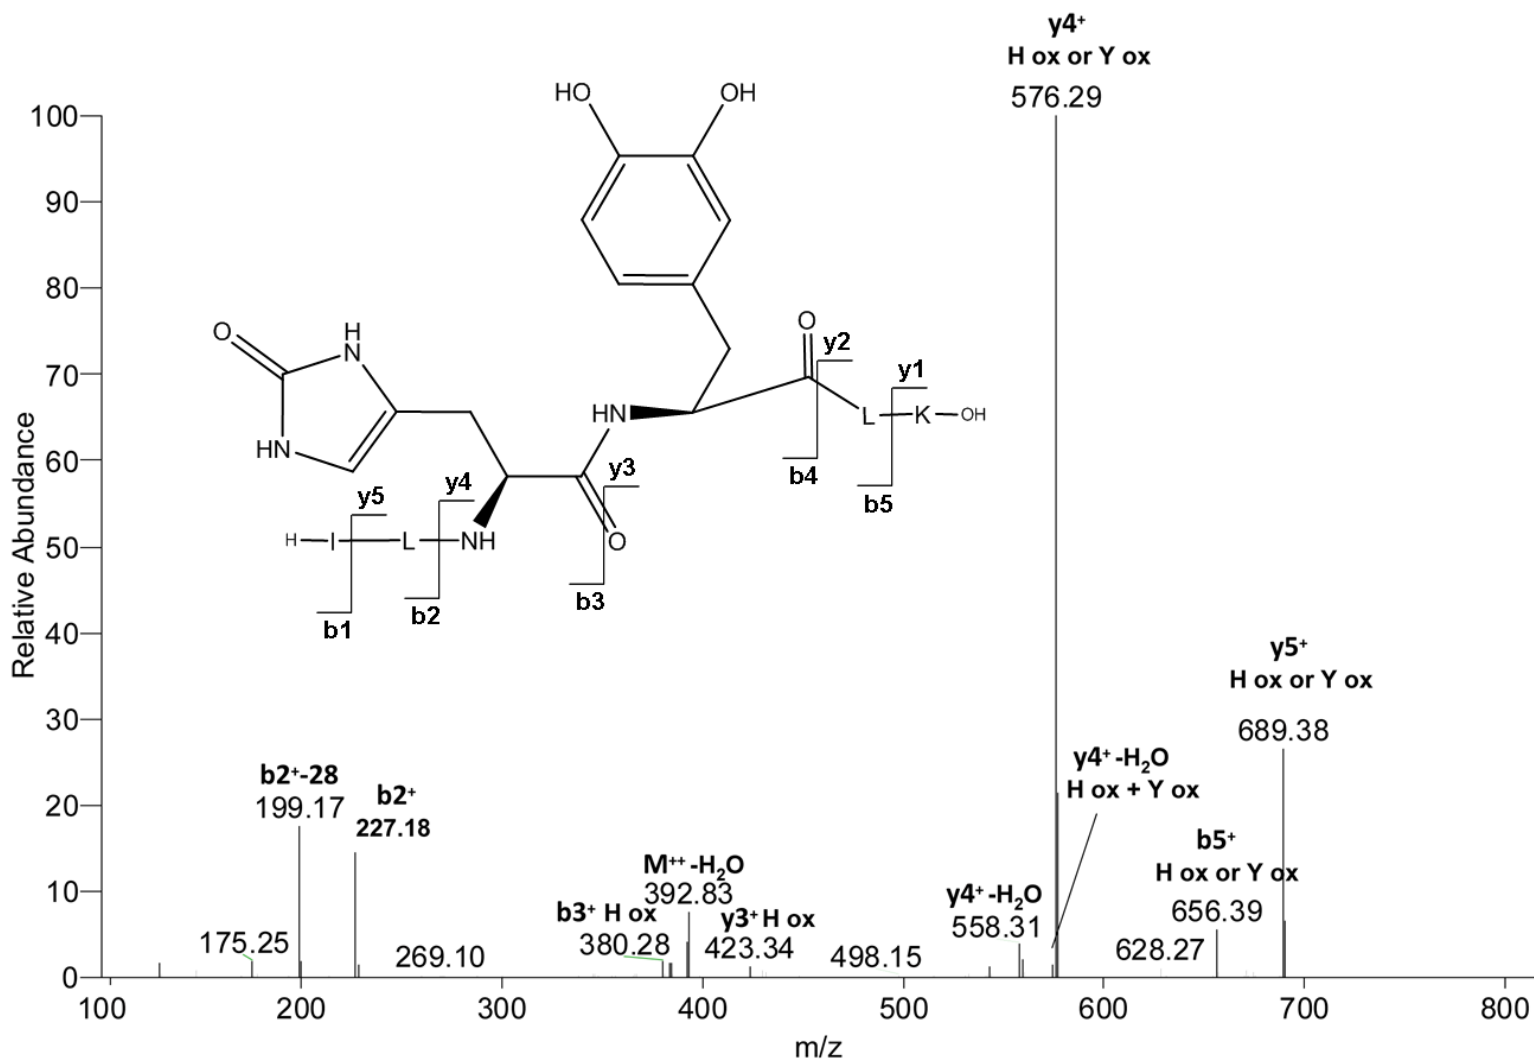

**Figure S16a** MS/MS spectrum and suggested chemical structure for the oxidized (+16 Da) sequence **I<sub>129</sub>LHYLK<sub>134</sub>** (theoretical mass 801.48, experimental  $m/z$  401.74  $[M+H]^+$ ,  $\Delta m$  from native parent peptide 0.00).

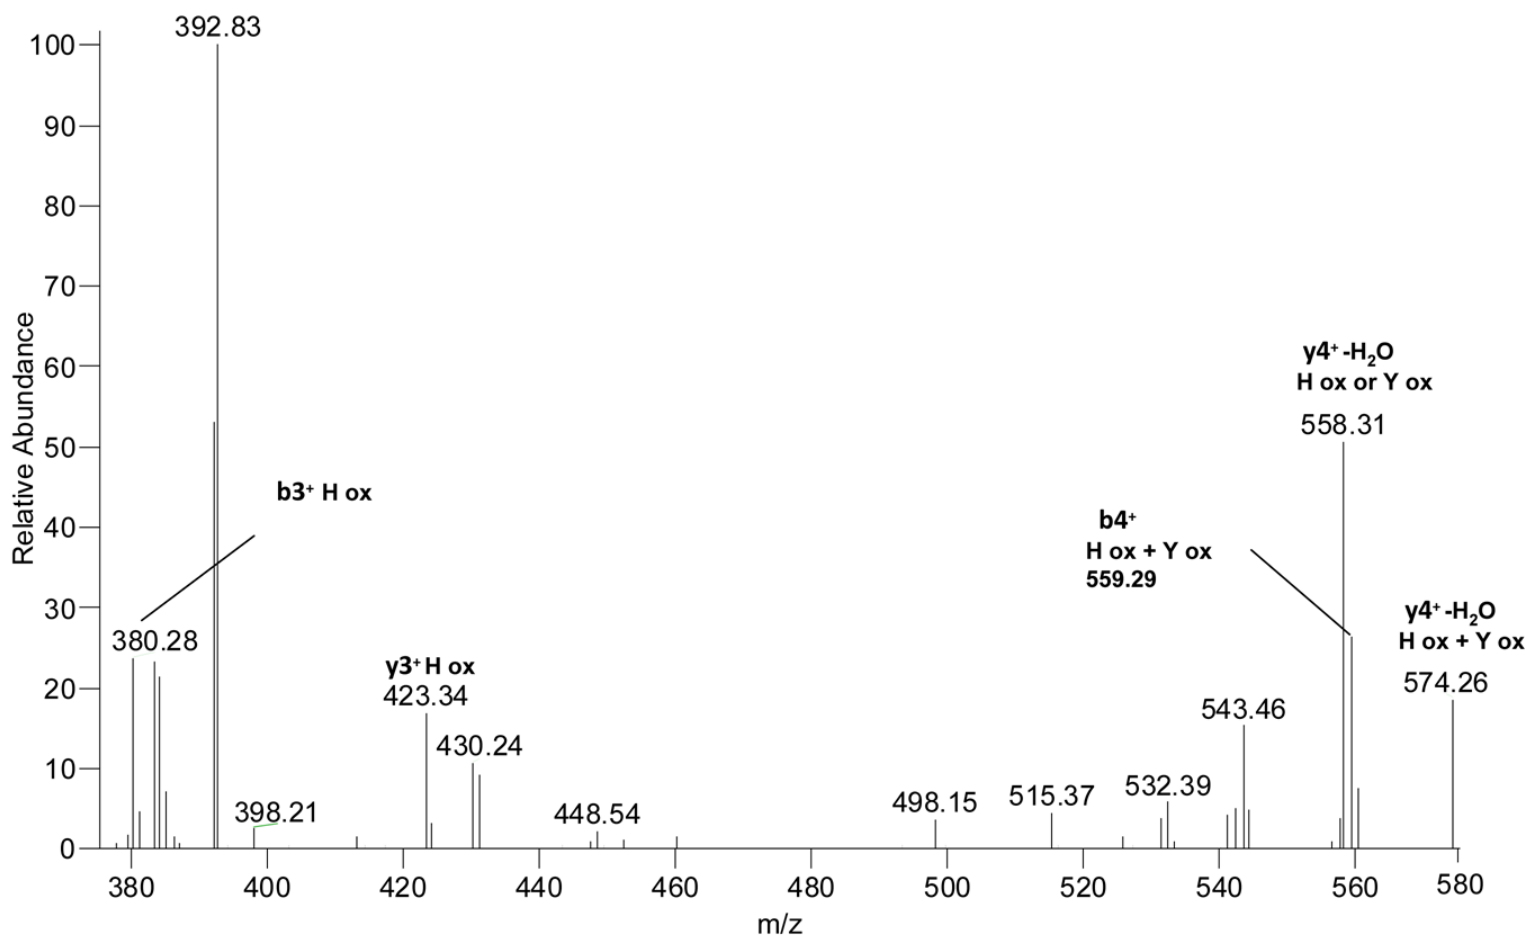

**Figure S16b** Zoom in (m/z range 375-580) of the MS/MS spectrum depicted in figure S16a.

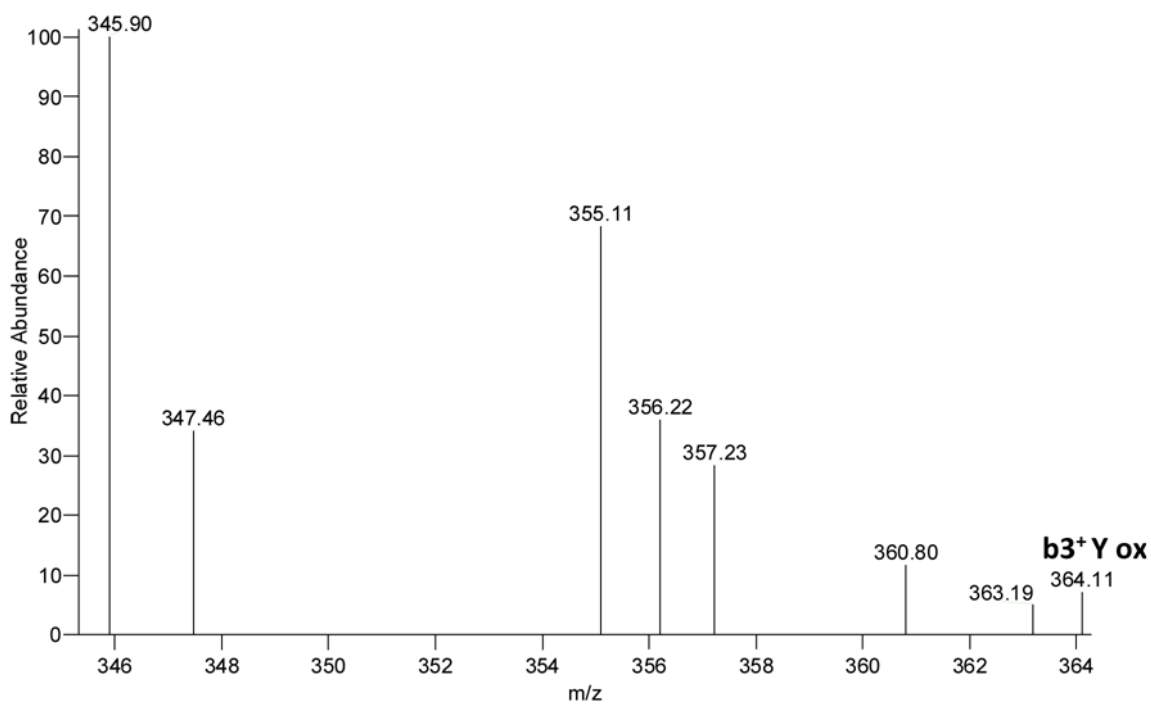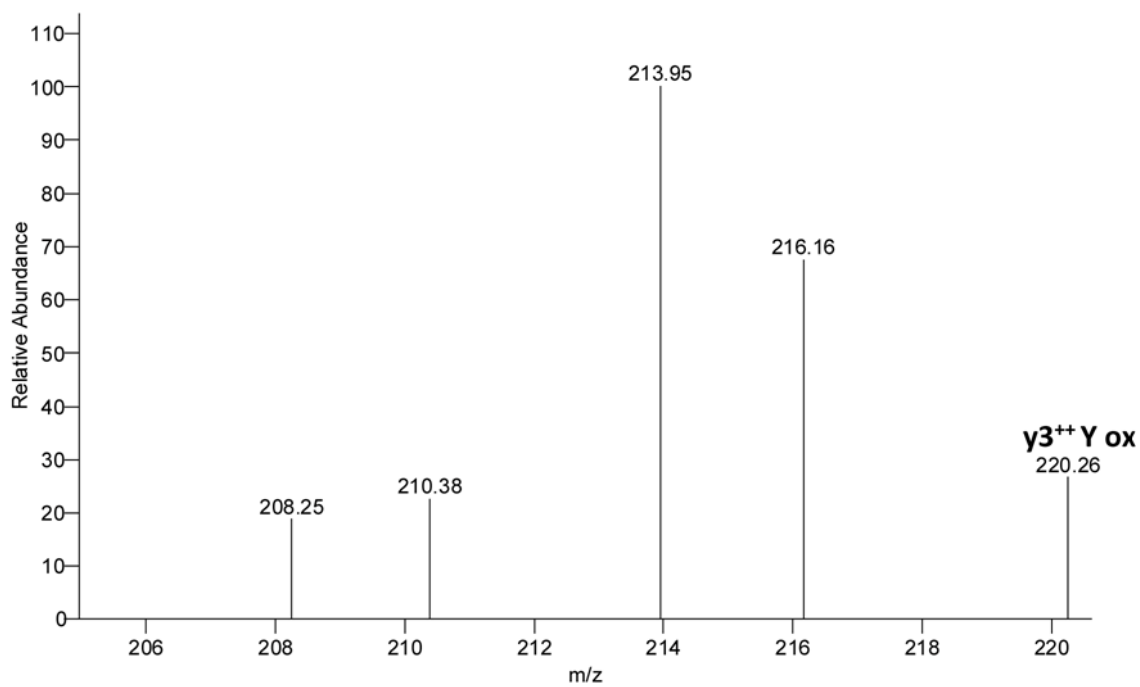

**Figure S16c** Zoom in ( $m/z$  range 345-365, upper panel, and 180-1400, lower panel) of the MS/MS spectrum depicted in figure S16a.



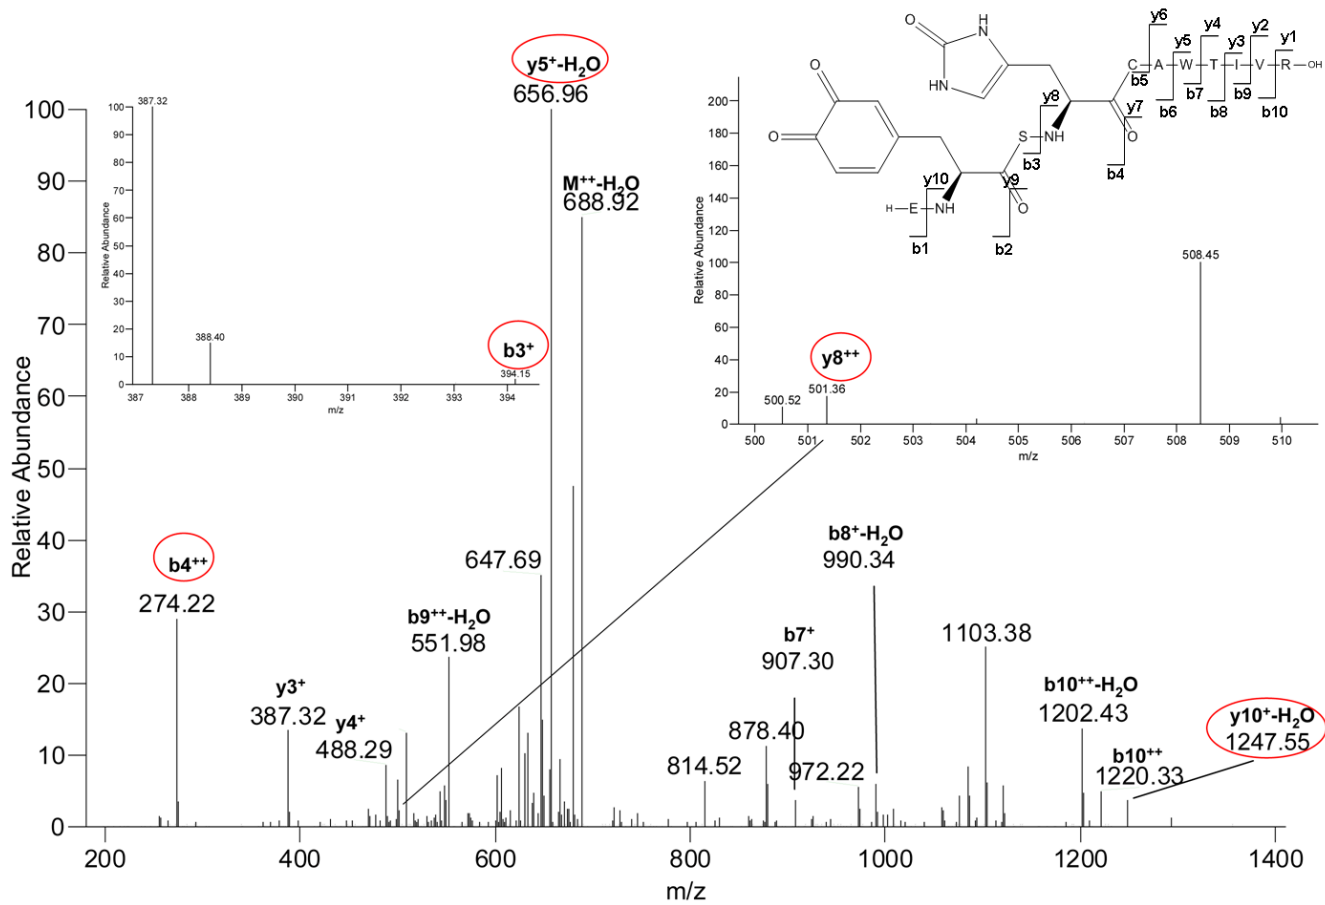

**Figure S17** MS/MS spectrum and suggested chemical structure for the oxidized (+32 Da) sequence  $E_{137}YSHCAWTIVR_{147}$  (theoretical mass 1393.62, experimental  $m/z$  697.81  $[M+H]^2+$ ,  $\Delta m$  from native parent peptide 0.00).

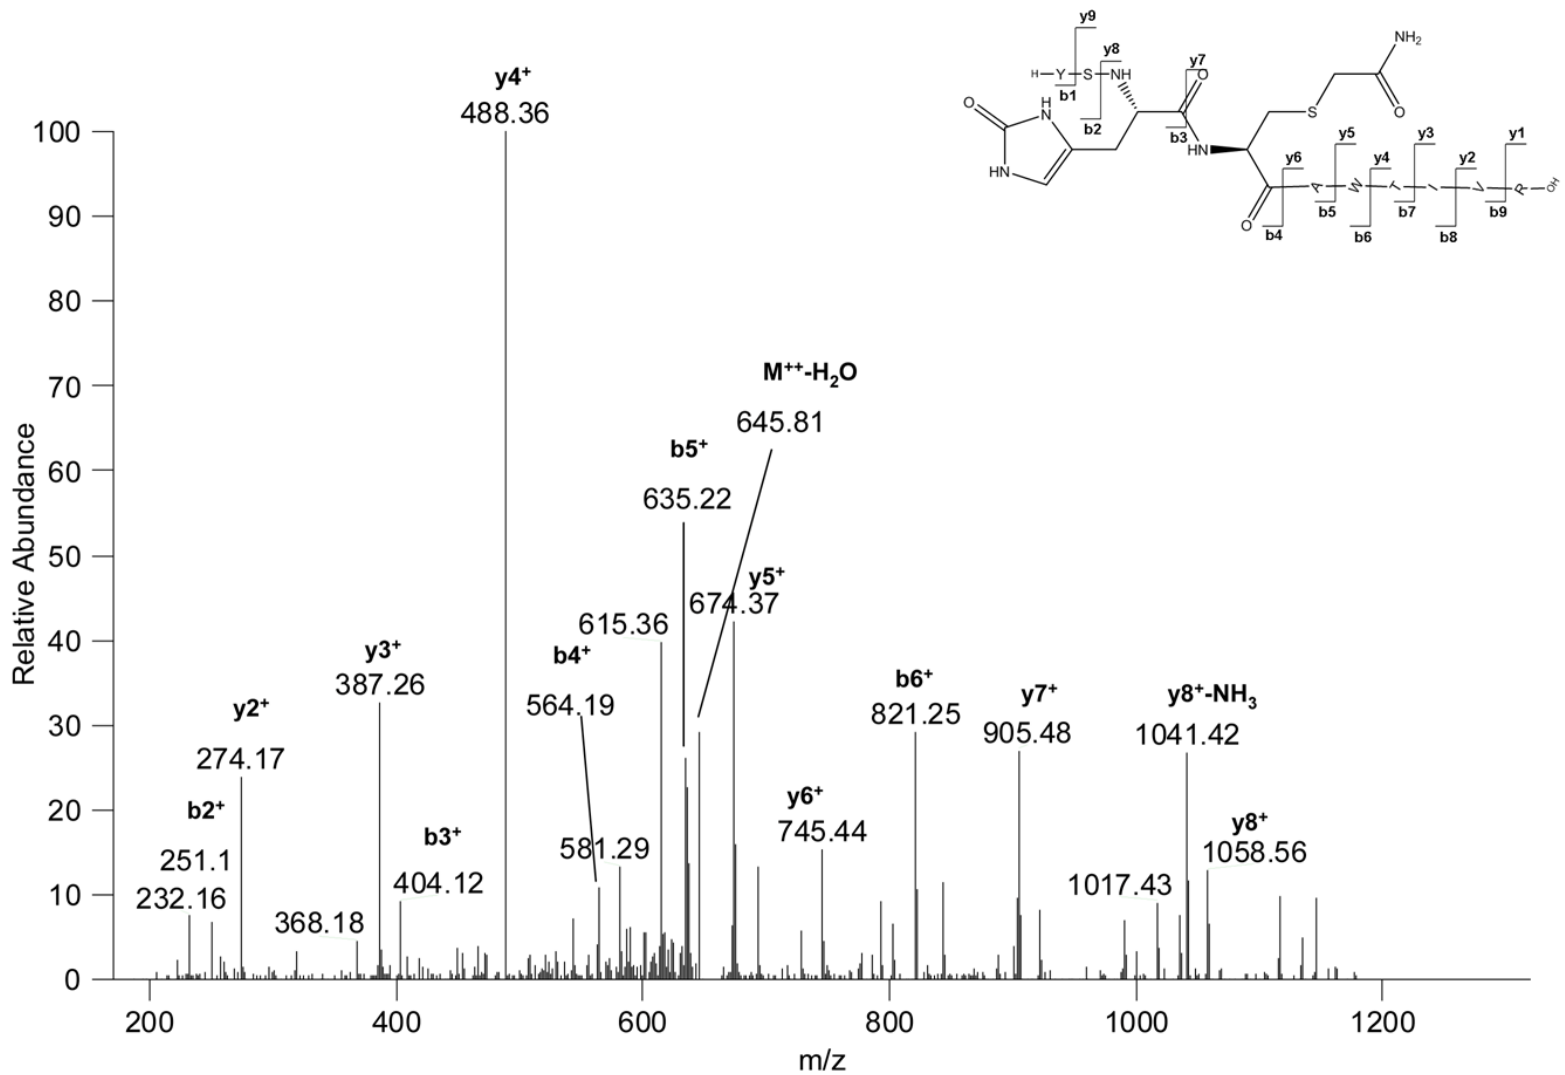

**Figure S18** MS/MS spectrum and suggested chemical structure for the oxidized (+16 da) sequence  $Y_{138}SHCAWTIVR_{147}$  (theoretical mass 1307.62, experimental  $m/z$  654.81  $[M+H]^{2+}$ ,  $\Delta m$  from native parent peptide 0.00).

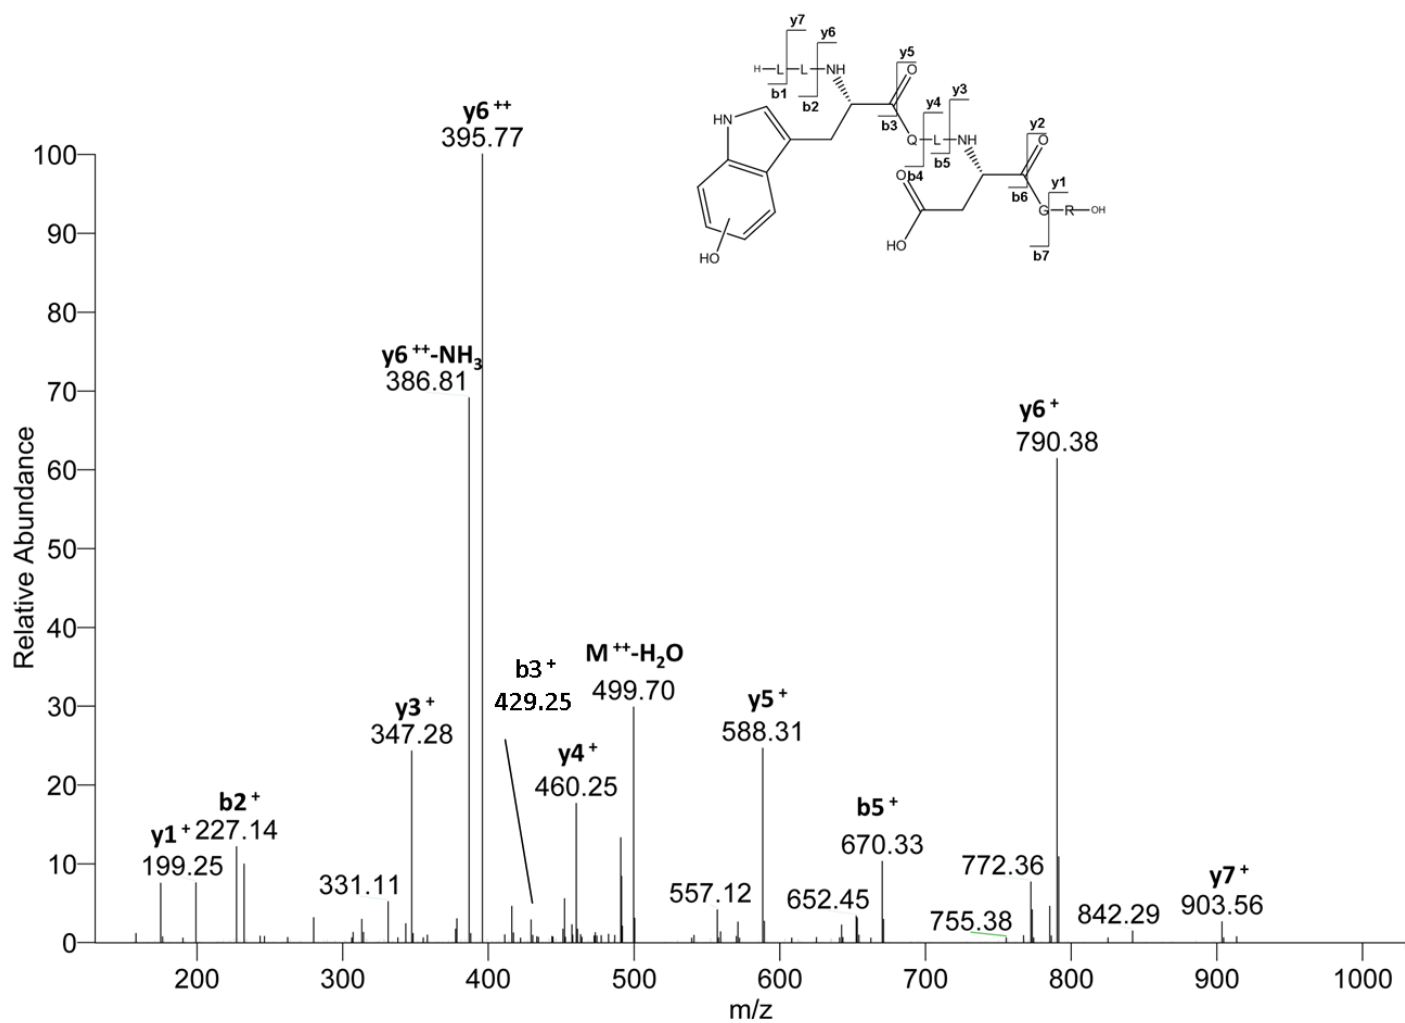

**Figure S19** MS/MS spectrum and suggested chemical structure for the oxidized (+16 Da) sequence **L<sub>20</sub>LWQLNGR<sub>27</sub>** (theoretical mass 1015.55, experimental  $m/z$  508.78,  $[M+H]^{2+}$ ,  $\Delta m$  from native parent peptide +0.01).

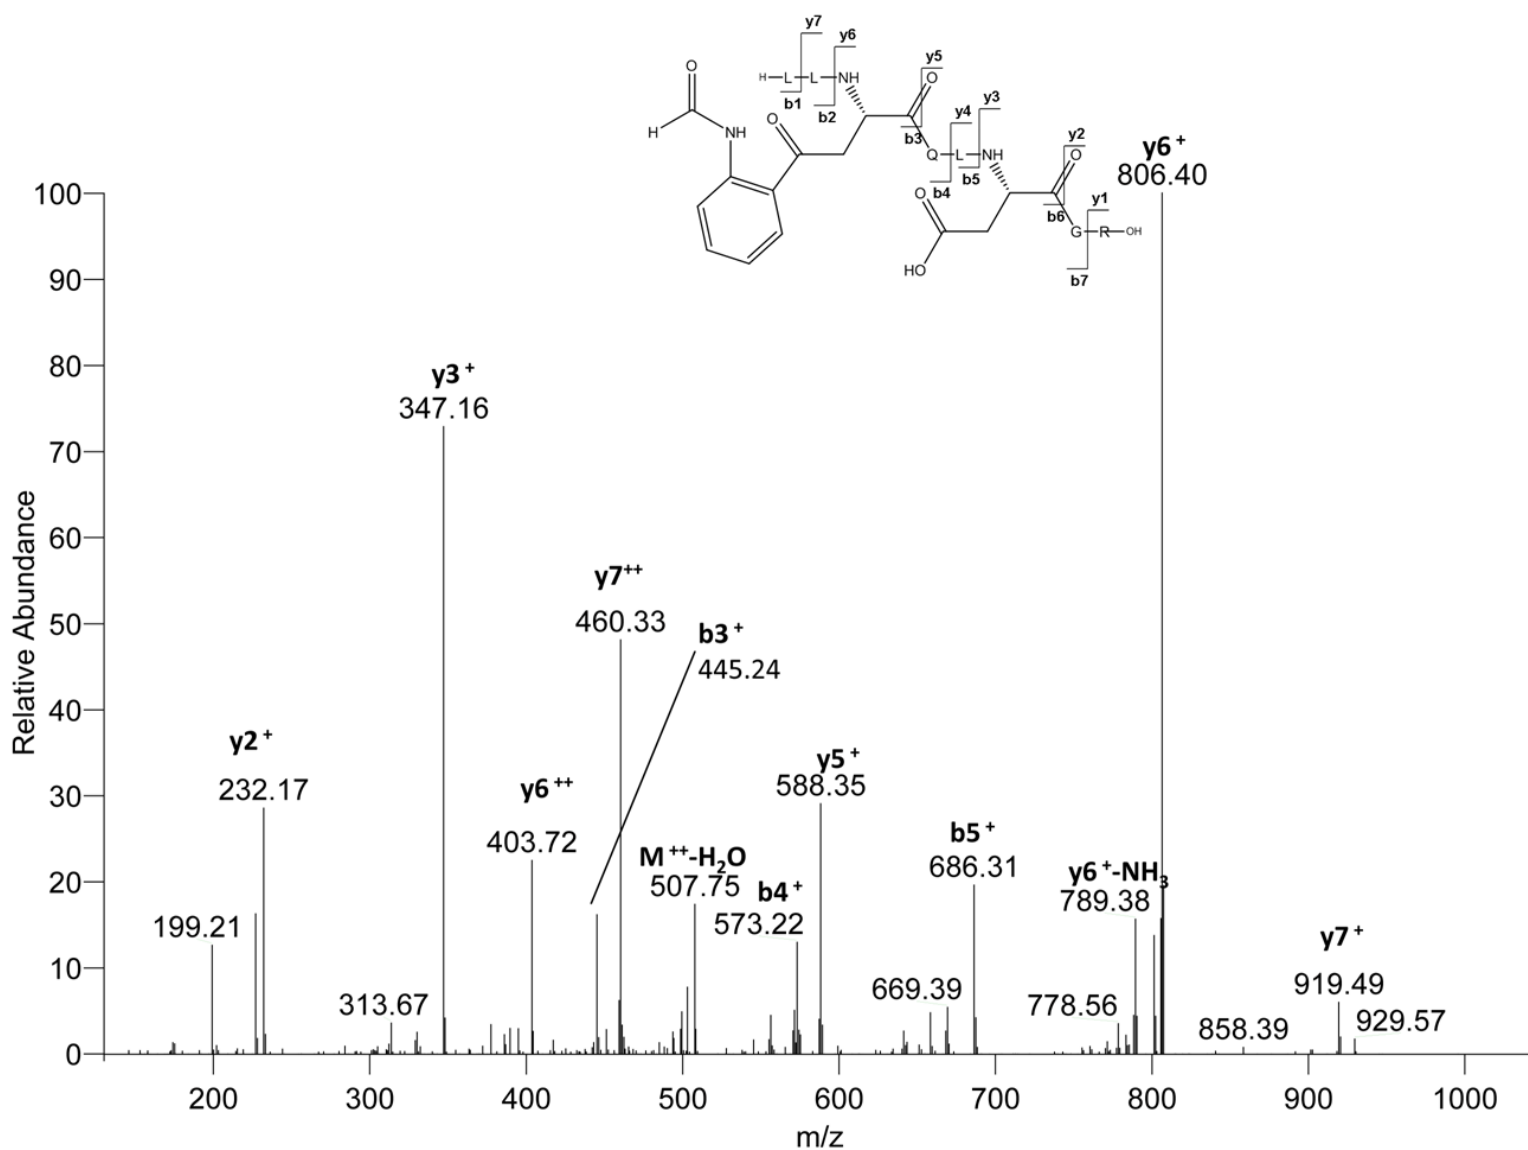

**Figure S20** MS/MS spectrum and suggested chemical structure for the oxidized (+32 Da) sequence  $L_{20}LWQLNGR_{27}$  (theoretical mass 1031.55, experimental  $m/z$  516.78,  $[M+H]^{2+}$ ,  $\Delta m$  from native parent peptide +0.01).

**Table S1** Potential chemical modifications of amino acid residues included in the settings of the database search employed to identify chemical changes in the primary structure of IFN $\beta$ 1a after MCO.

| Chemical modifications                                     | Chemical addition - deletion | $\Delta m$ (monoisotopic) in Da |
|------------------------------------------------------------|------------------------------|---------------------------------|
| Asn deamidation                                            | -H, -N, +O                   | +0.984016                       |
| Arg to glutamic semialdehyde                               | -C, -5H, -3N, +O             | -43.053433                      |
| Cys to sulfinic acid                                       | +2O                          | 31.989829                       |
| Cys to sulfonic acid                                       | +3O                          | 47.984744                       |
| Cys to oxoalanine                                          | -2H, +O, -S                  | -17.992806                      |
| Cys to carbamidomethyl cysteine (iodoacetamide alkylation) | +2C, +3H, +N, +O             | 57.021464                       |
| Met to sulfoxide                                           | +O                           | 15.994915                       |
| Met to sulfone                                             | +2O                          | 31.989829                       |
| Met loss of CH <sub>3</sub> SO from oxidized Met           | -C, -4H, -S                  | -48.003371                      |
| Gln deamidation                                            | -H, -N, +O                   | +0.984016                       |
| Gln to pyroglutamic acid                                   | -3H, -N                      | -17.026549                      |
| Glu to pyroglutamic acid                                   | -2H, -O                      | -18.010565                      |
| His to 2-oxo histidine                                     | +O                           | 15.994915                       |
| His to asparagine                                          | -2C, -H, -N, +O              | -23.015984                      |
| His to aspartic acid                                       | -2C, -2H, -2N, +2O           | -22.031969                      |

|                                                             |                  |            |
|-------------------------------------------------------------|------------------|------------|
| Lys to aminoadipic semialdehyde                             | -3H, -N, +O,     | -1.031634  |
| Lys to alpha aminoadipic acid                               | -3H, -N, +2O,    | 14.963280  |
| Lys peroxidation                                            | +2O              | 31.989829  |
| Lys to carbamidomethyl Lysine (iodoacetamide alkylation)    | +2C, +3H, +N, +O | 57.021464  |
| Tyr to TOPA (2,4,5-trihydroxyphenylalanine)                 | +2O              | 31.989829  |
| Thr to 2-amino-ketobutirric acid                            | -2H              | -2.015650  |
| Trp to hydroxytryptophan                                    | +O               | 15.994915  |
| Trp to kynurenine                                           | -C, +O           | 3.994915   |
| Trp to N-formyl kynurenine                                  | +2O              | 31.989829  |
| Phe to TOPA quinone (2,4,5-trihydroxyphenylalanine quinone) | -2H, +3O         | 45.969094  |
| Phe to TOPA (2,4,5-trihydroxyphenylalanine)                 | +3O              | 47.984744  |
| Phe to hydroxytyrosine                                      | +O               | 15.994915  |
| Phe to 3,4-dihydroxyphenylalanine (DOPA)                    | +2O              | 31.989829  |
| Phe to DOCH                                                 | -2H, +2O         | 29.974179  |
| Pro to Pyrrolidinone                                        | -C, -2H, -O      | -30.010565 |
| Pro to pyroglutamic acid                                    | -2H, +O          | 13.979265  |
| Tyr to 3,4-dihydroxyphenylalanine (DOPA)                    | +O               | 15.994915  |
| Tyr to DOCH                                                 | -2H, +O          | 13.979265  |
| Tyr to TOPA quinone (2,4,5-trihydroxyphenylalanine quinone) | -2H, +2O         | 29.974179  |
